# Supplementary material for: Antidepressant Sertraline Is a Broad-Spectrum Inhibitor of Enteroviruses Targeting Viral Entry through Neutralization of Endolysosomal Acidification
Source: MDPI journal article supplement (doi:10.3390/v14010109), 2022-01-08
Supplement: s1 [file s1]

**Table S1. Screen-Well® FDA Approved Drug Library II**

**BML-2843 Version 1.0**

**For Research Use Only**

| #  | Plate Location | Cat No.     | Name                           | CAS #       | MW     | Conc |
|----|----------------|-------------|--------------------------------|-------------|--------|------|
| 1  | 1-A02          | BML-A190    | Clindamycin·HCl                | 21462-39-5  | 461.4  | 10mM |
| 2  | 1-A03          | BML-DL567   | Felbamate                      | 25451-15-4  | 238.2  | 10mM |
| 3  | 1-A04          | BML-A195    | Cyclosporine A                 | 59865-13-3  | 1202.6 | 10mM |
| 4  | 1-A05          | BML-DL568   | Donepezil·HCl                  | 120011-70-3 | 416    | 10mM |
| 5  | 1-A06          | BML-A240    | Lincomycin·HCl                 | 7179-49-9   | 443    | 10mM |
| 6  | 1-A07          | BML-A249    | Mycophenolic Acid              | 24280-93-1  | 320.3  | 10mM |
| 7  | 1-A08          | BML-A275    | Sirolimus (Rapamycin)          | 53123-88-9  | 914.2  | 10mM |
| 8  | 1-A09          | BML-A280    | Spectinomycin·HCl Pentahydrate | 22189-32-8  | 495.3  | 10mM |
| 9  | 1-A10          | BML-AC105   | Amiodarone·HCl                 | 19774-82-4  | 681.8  | 10mM |
| 10 | 1-A11          | ALX-550-273 | Nicardipine·HCl                | 54527-84-3  | 516    | 10mM |
| 11 | 1-B02          | BML-AC109   | Pimozide                       | 2062-78-4   | 461.6  | 10mM |
| 12 | 1-B03          | ALX-550-253 | Loperamide·HCl                 | 34552-83-5  | 513.5  | 10mM |
| 13 | 1-B04          | ALX-550-301 | Tolbutamide                    | 64-77-7     | 270.3  | 10mM |
| 14 | 1-B05          | ALX-550-271 | Glipizide                      | 29094-61-9  | 445.5  | 10mM |
| 15 | 1-B06          | BML-AC121   | Phentolamine·HCl               | 73-05-2     | 317.8  | 10mM |
| 16 | 1-B07          | BML-AC122   | Quinine·HCl·H <sub>2</sub> O   | 6119-47-7   | 360.9  | 10mM |
| 17 | 1-B08          | BML-AC124   | Propafenone·HCl                | 34183-22-7  | 377.9  | 10mM |
| 18 | 1-B09          | BML-AC125   | Phenytoin                      | 57-41-0     | 252.3  | 10mM |
| 19 | 1-B10          | BML-AC127   | Procainamide·HCl               | 614-39-1    | 271.8  | 10mM |
| 20 | 1-B11          | BML-AC128   | Lidocaine·HCl·H <sub>2</sub> O | 73-78-9     | 270.8  | 10mM |
| 21 | 1-C02          | BML-AC130   | Flecainide Acetate             | 54143-56-5  | 474.4  | 10mM |
| 22 | 1-C03          | ALX-350-125 | Rosiglitazone                  | 122320-73-4 | 357.4  | 10mM |
| 23 | 1-C04          | BML-DL570   | Amantadine·HCl                 | 665-66-7    | 187.7  | 10mM |
| 24 | 1-C05          | BML-AC146   | Prazosin·HCl                   | 19237-84-4  | 419.9  | 10mM |
| 25 | 1-C06          | ALX-550-087 | Clonidine·HCl                  | 4205-91-8   | 266.6  | 10mM |
| 26 | 1-C07          | BML-AC153   | Guanabenz Acetate              | 23256-50-0  | 291.1  | 10mM |
| 27 | 1-C08          | BML-AC164   | Dihydroergotamine Mesylate     | 6190-39-2   | 679.8  | 10mM |
| 28 | 1-C09          | BML-DL564   | Emtricitabine                  | 143491-57-0 | 247.3  | 10mM |
| 29 | 1-C10          | BML-AC169   | Betaxolol·HCl                  | 63659-19-8  | 343.9  | 10mM |
| 30 | 1-C11          | ALX-550-322 | Caffeine                       | 58-08-2     | 194.2  | 10mM |
| 31 | 1-D02          | BML-AC172   | (S)-Timolol Maleate            | 26921-17-5  | 432.5  | 10mM |
| 32 | 1-D03          | BML-AC176   | Salbutamol Hemisulfate         | 51022-70-9  | 576.7  | 10mM |
| 33 | 1-D04          | BML-AC181   | Pindolol                       | 13523-86-9  | 248.3  | 10mM |
| 34 | 1-D05          | BML-AC185   | Dobutamine·HCl                 | 49745-95-1  | 337.8  | 10mM |
| 35 | 1-D06          | BML-AC192   | Sotalol·HCl                    | 959-24-0    | 308.8  | 10mM |
| 36 | 1-D07          | BML-AR111   | Maprotiline·HCl                | 10347-81-6  | 313.9  | 10mM |
| 37 | 1-D08          | ALX-550-092 | Pilocarpine·HCl                | 54-71-7     | 244.7  | 10mM |
| 38 | 1-D09          | BML-AC218   | Ipratropium·Br                 | 22254-24-6  | 412.4  | 10mM |
| 39 | 1-D10          | ALX-550-096 | Tropicamide                    | 1508-75-4   | 284.4  | 10mM |
| 40 | 1-D11          | BML-AC232   | Pancuronium·2Br                | 15500-66-0  | 732.7  | 10mM |
| 41 | 1-E02          | BML-AC238   | Ivermectin                     | 70288-86-7  | 875.1  | 10mM |
| 42 | 1-E03          | BML-AC250   | Haloperidol                    | 52-86-8     | 375.9  | 10mM |
| 43 | 1-E04          | BML-AC280   | Cimetidine                     | 51481-61-9  | 252.3  | 10mM |
| 44 | 1-E05          | BML-DL555   | Zonisamide                     | 68291-97-4  | 212.2  | 10mM |
| 45 | 1-E06          | ALX-430-153 | Zoledronic Acid Monohydrate    | 165800-06-6 | 290.1  | 10mM |
| 46 | 1-E07          | BML-AC322   | Naltrexone·HCl                 | 16676-29-2  | 377.9  | 10mM |
| 47 | 1-E08          | BML-DL560   | Zolmitriptan                   | 139264-17-8 | 287.4  | 10mM |
| 48 | 1-E09          | ALX-550-363 | Memantine·HCl                  | 41100-52-1  | 215.8  | 10mM |
| 49 | 1-E10          | BML-AC501   | Riluzole·HCl                   | 1744-22-5   | 270.7  | 10mM |
| 50 | 1-E11          | ALX-400-044 | Propofol                       | 2078-54-8   | 178.3  | 10mM |
| 51 | 1-F02          | BML-AC615   | Aminophylline                  | 317-34-0    | 210.2  | 10mM |
| 52 | 1-F03          | BML-DL561   | Nateglinide                    | 105816-04-4 | 317.4  | 10mM |
| 53 | 1-F04          | BML-AC729   | (±) Isoproterenol·HCl          | 51-30-9     | 247.7  | 10mM |
| 54 | 1-F05          | ALX-550-135 | Acetylcholine Chloride         | 60-31-1     | 181.7  | 10mM |
| 55 | 1-F06          | BML-AC735   | Atropine Sulfate Monohydrate   | 5908-99-6   | 694.8  | 10mM |
| 56 | 1-F07          | BML-AC748   | Apomorphine·HCl Hemihydrate    | 41372-20-7  | 312.8  | 10mM |

| #   | Plate Location | Cat No.     | Name                                           | CAS #       | MW     | Conc |
|-----|----------------|-------------|------------------------------------------------|-------------|--------|------|
| 57  | 1-F08          | ALX-270-171 | Chlorpromazine·HCl                             | 69-09-0     | 355.3  | 10mM |
| 58  | 1-F09          | BML-AC753   | Fluphenazine·HCl                               | 146-56-5    | 510.4  | 10mM |
| 59  | 1-F10          | BML-AC758   | Risperidone                                    | 106266-06-2 | 410.5  | 10mM |
| 60  | 1-F11          | BML-AC763   | Diphenhydramine·HCl                            | 147-24-0    | 291.8  | 10mM |
| 61  | 1-G02          | BML-AC765   | Promethazine·HCl                               | 58-33-3     | 320.9  | 10mM |
| 62  | 1-G03          | BML-AC766   | Ranitidine·HCl                                 | 66357-59-3  | 350.9  | 10mM |
| 63  | 1-G04          | BML-AC808   | Epinephrine (L-(-)-Epinephrine-(+)-Bitartrate) | 51-43-4     | 333.3  | 10mM |
| 64  | 1-G05          | ALX-550-076 | Norepinephrine Bitartrate Monohydrate          | 108341-18-0 | 337.3  | 10mM |
| 65  | 1-G06          | BML-DL557   | Quetiapine Fumarate                            | 111974-72-2 | 883.1  | 10mM |
| 66  | 1-G07          | BML-AC813   | Imipramine·HCl                                 | 113-52-0    | 316.9  | 10mM |
| 67  | 1-G08          | BML-AC814   | Amoxapine                                      | 14028-44-5  | 313.8  | 10mM |
| 68  | 1-G09          | BML-AC840   | Metoclopramide·HCl                             | 7232-21-5   | 336.3  | 10mM |
| 69  | 1-G10          | BML-AC893   | Nalbuphine·HCl Dihydrate                       | 23277-43-2  | 429.9  | 10mM |
| 70  | 1-G11          | BML-AC911   | Carbachol (Carbamylcholine ) Chloride          | 51-83-2     | 182.7  | 10mM |
| 71  | 1-H02          | BML-AC925   | Famotidine                                     | 76824-35-6  | 337.5  | 10mM |
| 72  | 1-H03          | BML-AC986   | Isoniazid                                      | 54-85-3     | 137.1  | 10mM |
| 73  | 1-H04          | BML-AC993   | Ticlopidine·HCl                                | 53885-35-1  | 300.2  | 10mM |
| 74  | 1-H05          | BML-DL247   | Clemastine Fumarate                            | 14976-57-9  | 460    | 10mM |
| 75  | 1-H06          | BML-DL248   | Vardenafil                                     | 224785-90-4 | 488.6  | 10mM |
| 76  | 1-H07          | BML-DL249   | Linezolid                                      | 165800-03-3 | 337.4  | 10mM |
| 77  | 1-H08          | BML-DL250   | Docetaxel (Taxotere)                           | 114977-28-5 | 807.9  | 10mM |
| 78  | 1-H09          | BML-DL251   | Olopatadine                                    | 113806-05-6 | 337.4  | 10mM |
| 79  | 1-H10          | BML-DL252   | Tolcapone                                      | 134308-13-7 | 273.2  | 10mM |
| 80  | 1-H11          | BML-DL254   | Olmesartan                                     | 144689-24-7 | 446.5  | 10mM |
| 81  | 2-A02          | BML-DL255   | Nisoldipine                                    | 63675-72-9  | 388.4  | 10mM |
| 82  | 2-A03          | BML-DL257   | Olanzapine                                     | 132539-06-1 | 312.4  | 10mM |
| 83  | 2-A04          | BML-G226    | Lovastatin                                     | 75330-75-5  | 404.5  | 10mM |
| 84  | 2-A05          | ALX-430-160 | Lamotrigine                                    | 84057-84-1  | 256.1  | 10mM |
| 85  | 2-A06          | BML-DL572   | Azathioprine                                   | 446-86-6    | 277.3  | 10mM |
| 86  | 2-A07          | BML-DL261   | Sildenafil Citrate                             | 171599-83-0 | 666.7  | 10mM |
| 87  | 2-A08          | BML-DL262   | Atovaquone                                     | 95233-18-4  | 366.8  | 10mM |
| 88  | 2-A09          | BML-DL208   | Sertaconazole                                  | 99592-32-2  | 437.8  | 10mM |
| 89  | 2-A10          | BML-DL191   | Cefepime·HCl Hydrate                           | 123171-59-5 | 571.5  | 10mM |
| 90  | 2-A11          | BML-DL178   | Aripiprazole                                   | 129722-12-9 | 448.4  | 10mM |
| 91  | 2-B02          | BML-DL264   | Candesartan                                    | 139481-59-7 | 440.5  | 10mM |
| 92  | 2-B03          | BML-DL101   | Butenafine·HCl                                 | 101827-46-7 | 353.9  | 10mM |
| 93  | 2-B04          | BML-DL200   | Dorzolamide·HCl                                | 130693-82-2 | 360.9  | 10mM |
| 94  | 2-B05          | BML-DL212   | Escitalopram                                   | 128196-01-0 |        | 10mM |
| 95  | 2-B06          | BML-DL209   | Eprosartan Mesylate                            | 144143-96-4 | 520.6  | 10mM |
| 96  | 2-B07          | BML-DL217   | Entacapone                                     | 130929-57-6 | 305.3  | 10mM |
| 97  | 2-B08          | BML-AP302   | Bleomycin Sulfate                              | 9041-93-4   | 1512.6 | 10mM |
| 98  | 2-B09          | BML-AR102   | Guanfacine·HCl                                 | 29110-48-3  | 282.6  | 10mM |
| 99  | 2-B10          | BML-AR103   | Tizanidine·HCl                                 | 64461-82-1  | 290.2  | 10mM |
| 100 | 2-B11          | BML-AR112   | Carvedilol                                     | 72956-09-3  | 406.5  | 10mM |
| 101 | 2-C02          | BML-B100    | Flumazenil                                     | 78755-81-4  | 303.3  | 10mM |
| 102 | 2-C03          | BML-DL269   | Gefitinib                                      | 184475-35-2 | 446.9  | 10mM |
| 103 | 2-C04          | ALX-270-492 | Imatinib Mesylate                              | 220127-57-1 | 589.7  | 10mM |
| 104 | 2-C05          | ALX-380-260 | Idarubicin·HCl                                 | 57852-57-0  | 534    | 10mM |
| 105 | 2-C06          | BML-DL273   | Montelukast·Na                                 | 151767-02-1 | 608.2  | 10mM |
| 106 | 2-C07          | BML-DL573   | Exemestane                                     | 107868-30-4 | 296.4  | 10mM |
| 107 | 2-C08          | BML-PG007   | Dinoprostone                                   | 363-24-6    | 352.5  | 10mM |
| 108 | 2-C09          | ALX-270-432 | Metformin·HCl                                  | 1115-70-4   | 165.6  | 10mM |
| 109 | 2-C10          | BML-DL277   | Anagrelide                                     | 68473-42-5  | 256.1  | 10mM |
| 110 | 2-C11          | BML-DL278   | Dofetilide                                     | 115256-11-6 | 441.6  | 10mM |
| 111 | 2-D02          | BML-DL279   | Erlotinib                                      | 183321-74-6 | 393.4  | 10mM |
| 112 | 2-D03          | BML-C110    | Tacrine·HCl                                    | 1684-40-8   | 234.7  | 10mM |
| 113 | 2-D04          | ALX-550-336 | Galantamine·HBr                                | 1953-04-4   | 368.3  | 10mM |
| 114 | 2-D05          | BML-CA200   | Amloride·HCl·2H2O                              | 17440-83-4  | 302.1  | 10mM |
| 115 | 2-D06          | BML-CA202   | Amlodipine                                     | 88150-42-9  | 408.9  | 10mM |

| #   | Plate Location | Cat No.     | Name                                | CAS #       | MW     | Conc |
|-----|----------------|-------------|-------------------------------------|-------------|--------|------|
| 116 | 2-D07          | ALX-550-214 | Diltiazem·HCl                       | 33286-22-5  | 451    | 10mM |
| 117 | 2-D08          | ALX-550-091 | Nifedipine                          | 21829-25-4  | 346.3  | 10mM |
| 118 | 2-D09          | ALX-550-277 | Nimodipine                          | 66085-59-4  | 418.5  | 10mM |
| 119 | 2-D10          | ALX-550-306 | Verapamil·HCl                       | 152-11-4    | 491.1  | 10mM |
| 120 | 2-D11          | BML-CA234   | Gabapentin                          | 60142-96-3  | 171.2  | 10mM |
| 121 | 2-E02          | BML-CA236   | Felodipine                          | 72509-76-3  | 384.3  | 10mM |
| 122 | 2-E03          | ALX-430-039 | Phenoxybenzamine·HCl                | 63-92-3     | 340.3  | 10mM |
| 123 | 2-E04          | ALX-550-310 | Trifluoperazine·HCl                 | 440-17-5    | 480.4  | 10mM |
| 124 | 2-E05          | BML-DL281   | Latanoprost                         | 130209-82-4 | 432.6  | 10mM |
| 125 | 2-E06          | BML-DL574   | Alfuzosin                           | 81403-80-7  | 389.5  | 10mM |
| 126 | 2-E07          | BML-D102    | Bromocriptine Mesylate              | 22260-51-1  | 750.7  | 10mM |
| 127 | 2-E08          | BML-D107    | Clozapine                           | 5786-21-0   | 326.8  | 10mM |
| 128 | 2-E09          | BML-DL575   | Acitretin                           | 55079-83-9  | 326.4  | 10mM |
| 129 | 2-E10          | BML-DM200   | Calcitriol                          | 32222-06-3  | 416.6  | 10mM |
| 130 | 2-E11          | BML-EI107   | Ketoconazole                        | 65277-42-1  | 531.4  | 10mM |
| 131 | 2-F02          | BML-EI121   | Cromolyn·Na (Disodium Cromoglycate) | 15826-37-6  | 512.3  | 10mM |
| 132 | 2-F03          | BML-EI125   | Capsaicin                           | 404-86-4    | 305.5  | 10mM |
| 133 | 2-F04          | BML-EI126   | Dexamethasone                       | 50-02-2     | 392.5  | 10mM |
| 134 | 2-F05          | BML-EI127   | Dipyridamole                        | 58-32-2     | 504.6  | 10mM |
| 135 | 2-F06          | BML-EI128   | Ethacrynic Acid                     | 58-54-8     | 303.1  | 10mM |
| 136 | 2-F07          | ALX-270-086 | Indomethacin                        | 53-86-1     | 357.8  | 10mM |
| 137 | 2-F08          | ALX-270-102 | Naproxen                            | 22204-53-1  | 230.3  | 10mM |
| 138 | 2-F09          | BML-EI164   | Ibuprofen                           | 15687-27-1  | 206.3  | 10mM |
| 139 | 2-F10          | BML-EI168   | Bumetanide                          | 28395-03-1  | 364.4  | 10mM |
| 140 | 2-F11          | ALX-380-035 | Neomycin Sulfate                    | 1405-10-3   | 908.9  | 10mM |
| 141 | 2-G02          | BML-EI206   | Auranofin                           | 34031-32-8  | 678.5  | 10mM |
| 142 | 2-G03          | ALX-270-212 | Captopril                           | 62571-86-2  | 217.3  | 10mM |
| 143 | 2-G04          | BML-EI217   | Tranlycypromine Hemisulfate         | 13492-01-8  | 182.2  | 10mM |
| 144 | 2-G05          | ALX-430-040 | Piroxicam                           | 36322-90-4  | 331.3  | 10mM |
| 145 | 2-G06          | BML-DL577   | Moxifloxacin·HCl                    | 186826-86-8 | 437.9  | 10mM |
| 146 | 2-G07          | BML-EI265   | Carbidopa                           | 28860-95-9  | 226.2  | 10mM |
| 147 | 2-G08          | BML-EI288   | Ketoprofen                          | 22071-15-4  | 254.3  | 10mM |
| 148 | 2-G09          | BML-EI292   | Meloxicam                           | 71125-38-7  | 351.4  | 10mM |
| 149 | 2-G10          | BML-EI318   | Terbinafine·HCl                     | 78628-80-5  | 327.9  | 10mM |
| 150 | 2-G11          | BML-EI320   | Sodium Phenylbutyrate               | 1716-12-7   | 186.2  | 10mM |
| 151 | 2-H02          | BML-G244    | Simvastatin                         | 79902-63-9  | 418.6  | 10mM |
| 152 | 2-H03          | BML-DL282   | Goserelin Acetate                   | 145781-92-6 | 1269.4 | 10mM |
| 153 | 2-H04          | BML-GR243   | Raloxifene·HCl                      | 82640-04-8  | 510.1  | 10mM |
| 154 | 2-H05          | ALX-380-071 | Rifampin (Rifampicin)               | 13292-46-1  | 822.9  | 10mM |
| 155 | 2-H06          | BML-GR307   | Etoposide                           | 33419-42-0  | 588.6  | 10mM |
| 156 | 2-H07          | BML-GR311   | Mitomycin C                         | 50-07-7     | 334.3  | 10mM |
| 157 | 2-H08          | BML-GR314   | Delavirdine Mesylate                | 147221-93-0 | 522.7  | 10mM |
| 158 | 2-H09          | ALX-380-043 | Daunorubicin·HCl                    | 23541-50-6  | 564    | 10mM |
| 159 | 2-H10          | BML-GR319   | Doxorubicin·HCl                     | 25316-40-9  | 580    | 10mM |
| 160 | 2-H11          | BML-DL578   | Cetirizine 2HCl                     | 83881-52-1  | 461.8  | 10mM |
| 161 | 3-A02          | BML-DL284   | Lapatinib Ditosylate                | 388082-77-7 | 925.5  | 10mM |
| 162 | 3-A03          | BML-GR240   | Pioglitazone·HCl                    | 112529-15-4 | 392.9  | 10mM |
| 163 | 3-A04          | BML-DL288   | Rivastigmine Tartrate               | 129101-54-8 | 400.4  | 10mM |
| 164 | 3-A05          | BML-DL236   | Ergotamine Tartrate                 | 379-79-3    | 656.7  | 10mM |
| 165 | 3-A06          | ALX-430-105 | Sulindac                            | 38194-50-2  | 356.4  | 10mM |
| 166 | 3-A07          | ALX-550-304 | Valproic Acid                       | 99-66-1     | 144.2  | 10mM |
| 167 | 3-A08          | BML-DL547   | Calcipotriene                       | 112965-21-6 | 412.6  | 10mM |
| 168 | 3-A09          | BML-DL294   | Zafirlukast                         | 107753-78-6 | 575.7  | 10mM |
| 169 | 3-A10          | BML-DL295   | Zileuton                            | 111406-87-2 | 236.3  | 10mM |
| 170 | 3-A11          | BML-DL297   | Bortezomib                          | 179324-69-7 | 384.2  | 10mM |
| 171 | 3-B02          | ALX-550-260 | Diazoxide                           | 364-98-7    | 230.7  | 10mM |
| 172 | 3-B03          | BML-KC120   | Glyburide                           | 10238-21-8  | 494    | 10mM |
| 173 | 3-B04          | BML-KC125   | Minoxidil                           | 38304-91-5  | 209.3  | 10mM |
| 174 | 3-B05          | ALX-550-216 | Tolazamide                          | 1156-19-0   | 311.4  | 10mM |

| #   | Plate Location | Cat No.     | Name                                          | CAS #       | MW     | Conc |
|-----|----------------|-------------|-----------------------------------------------|-------------|--------|------|
| 175 | 3-B06          | BML-DL298   | Bexarotene                                    | 153559-49-0 | 348.5  | 10mM |
| 176 | 3-B07          | BML-DL579   | Tranexamic Acid                               | 1197-18-8   | 157.2  | 10mM |
| 177 | 3-B08          | BML-DL299   | Celecoxib                                     | 169590-42-5 | 381.4  | 10mM |
| 178 | 3-B09          | BML-DL172   | Levetiracetam                                 | 102767-28-2 | 170.2  | 10mM |
| 179 | 3-B10          | BML-DL300   | Letrozole                                     | 112809-51-5 | 285.3  | 10mM |
| 180 | 3-B11          | BML-DL144   | Anastrozole                                   | 120511-73-1 | 293.4  | 10mM |
| 181 | 3-C02          | ALX-270-476 | Bicalutamide                                  | 90357-06-5  | 430.4  | 10mM |
| 182 | 3-C03          | BML-DL102   | Clindamycin Palmitate·HCl                     | 25507-04-4  | 699.9  | 10mM |
| 183 | 3-C04          | ALX-270-288 | Vorinostat                                    | 149647-78-9 | 264.3  | 10mM |
| 184 | 3-C05          | BML-DL302   | Didanosine                                    | 69655-05-6  | 236.2  | 10mM |
| 185 | 3-C06          | BML-DL199   | Dolasetron                                    | 115956-12-2 | 324.4  | 10mM |
| 186 | 3-C07          | BML-DL192   | Enalaprilat Maleate                           | 76095-16-4  | 492.5  | 10mM |
| 187 | 3-C08          | ALX-270-466 | Fluvastatin·Na                                | 93957-55-2  | 433.5  | 10mM |
| 188 | 3-C09          | BML-DL155   | Fosinopril·Na                                 | 88889-14-9  | 585.6  | 10mM |
| 189 | 3-C10          | ALX-480-101 | Gemcitabine·HCl                               | 122111-03-9 | 299.7  | 10mM |
| 190 | 3-C11          | BML-DL166   | Granisetron·HCl                               | 107007-99-8 | 348.9  | 10mM |
| 191 | 3-D02          | ALX-400-042 | Oxaliplatin                                   | 61825-94-3  | 397.3  | 10mM |
| 192 | 3-D03          | BML-DL546   | Atazanavir                                    | 198904-31-3 | 704.9  | 10mM |
| 193 | 3-D04          | BML-IM101   | Mycophenolate Mofetil                         | 128794-94-5 | 433.5  | 10mM |
| 194 | 3-D05          | BML-DL103   | Clofarabine                                   | 123318-82-1 | 303.7  | 10mM |
| 195 | 3-D06          | BML-DL219   | Cabergoline                                   | 81409-90-7  | 451.6  | 10mM |
| 196 | 3-D07          | BML-DL213   | Ibandronate·Na Monohydrate                    | 138926-19-9 | 359.2  | 10mM |
| 197 | 3-D08          | BML-DL202   | Imipenem                                      | 64221-86-9  | 299.4  | 10mM |
| 198 | 3-D09          | ALX-400-038 | Lomustine                                     | 13010-47-4  | 233.7  | 10mM |
| 199 | 3-D10          | BML-GR111   | Adapalene                                     | 106685-40-9 | 412.5  | 10mM |
| 200 | 3-D11          | BML-DL167   | Meropenem                                     | 96036-03-2  | 383.5  | 10mM |
| 201 | 3-E02          | BML-DL194   | Oseltamivir Phosphate                         | 204255-11-8 | 410.4  | 10mM |
| 202 | 3-E03          | BML-DL196   | Pamidronate Disodium Pentahydrate (Pamidronic | 109552-15-0 | 369.1  | 10mM |
| 203 | 3-E04          | BML-DL197   | Pramipexole Dihydrochloride Monohydrate       | 191217-81-9 | 302.3  | 10mM |
| 204 | 3-E05          | BML-DL310   | Triptorelin Acetate                           | 140194-24-7 | 1311.5 | 10mM |
| 205 | 3-E06          | BML-DL198   | Risedronic Acid                               | 105462-24-6 | 283.1  | 10mM |
| 206 | 3-E07          | BML-DL187   | Rocuronium Bromide                            | 119302-91-9 | 609.7  | 10mM |
| 207 | 3-E08          | BML-NP461   | Vinorelbine                                   | 71486-22-1  | 778.9  | 10mM |
| 208 | 3-E09          | BML-DL210   | Salmeterol                                    | 893365-50-4 | 415.6  | 10mM |
| 209 | 3-E10          | BML-T117    | Vincristine Sulfate                           | 2068-78-2   | 923    | 10mM |
| 210 | 3-E11          | ALX-430-115 | Aspirin (Acetylsalicylic Acid)                | 50-78-2     | 180.2  | 10mM |
| 211 | 3-F02          | BML-DL316   | Acyclovir (Acycloguanosine) Zovirax           | 59277-89-3  | 225.2  | 10mM |
| 212 | 3-F03          | BML-DL317   | Zidovudine (3'-Azido-3'-Deoxythymidine)       | 30516-87-1  | 267.2  | 10mM |
| 213 | 3-F04          | BML-DL318   | Allopurinol                                   | 315-30-0    | 136.1  | 10mM |
| 214 | 3-F05          | BML-DL320   | Altretamine                                   | 645-05-6    | 210.3  | 10mM |
| 215 | 3-F06          | BML-PR123   | <b>Alendronate·Na Trihydrate</b>              | 121268-17-5 | 325.1  | 10mM |
| 216 | 3-F07          | BML-DL321   | Albendazole                                   | 54965-21-8  | 265.3  | 10mM |
| 217 | 3-F08          | BML-DL565   | Sumatriptan Succinate                         | 103628-48-4 | 372.4  | 10mM |
| 218 | 3-F09          | BML-GR341   | Amifostine                                    | 20537-88-6  | 214.2  | 10mM |
| 219 | 3-F10          | BML-DL325   | 4-Aminosalicylic Acid                         | 65-49-6     | 153.1  | 10mM |
| 220 | 3-F11          | ALX-430-110 | Mesalamine (5-Aminosalicylic Acid)            | 89-57-6     | 153.1  | 10mM |
| 221 | 3-G02          | BML-DL327   | Ampicillin Trihydrate                         | 7177-48-2   | 403.5  | 10mM |
| 222 | 3-G03          | BML-AC166   | (±)-Atenolol                                  | 29122-68-7  | 266.3  | 10mM |
| 223 | 3-G04          | BML-DL332   | Atracurium Besylate                           | 64228-81-5  | 1243.5 | 10mM |
| 224 | 3-G05          | ALX-350-257 | Vinblastine Sulfate                           | 143-67-9    | 909.1  | 10mM |
| 225 | 3-G06          | BML-DL335   | Azithromycin                                  | 83905-01-5  | 749    | 10mM |
| 226 | 3-G07          | BML-DL336   | Aztreonam                                     | 78110-38-0  | 435.4  | 10mM |
| 227 | 3-G08          | BML-DL337   | Betamethasone                                 | 378-44-9    | 392.5  | 10mM |
| 228 | 3-G09          | BML-DL339   | Bisacodyl                                     | 603-50-9    | 361.4  | 10mM |
| 229 | 3-G10          | BML-DL341   | Buspirone·HCl                                 | 33386-08-2  | 422    | 10mM |
| 230 | 3-G11          | ALX-400-041 | Carboplatin                                   | 41575-94-4  | 371.3  | 10mM |
| 231 | 3-H02          | ALX-550-084 | Carbamazepine                                 | 298-46-4    | 236.3  | 10mM |
| 232 | 3-H03          | BML-DL347   | Cefotaxime Acid                               | 63527-52-6  | 455.5  | 10mM |
| 233 | 3-H04          | BML-DL348   | Ceftazidime                                   | 72558-82-8  | 346.6  | 10mM |

| #   | Plate Location | Cat No.     | Name                                | CAS #       | MW    | Conc |
|-----|----------------|-------------|-------------------------------------|-------------|-------|------|
| 234 | 3-H05          | BML-DL349   | Chloramphenicol                     | 56-75-7     | 323.1 | 10mM |
| 235 | 3-H06          | ALX-400-049 | Chlorambucil                        | 305-03-3    | 304.2 | 10mM |
| 236 | 3-H07          | BML-DL352   | Chlorpheniramine Maleate            | 113-92-8    | 390.9 | 10mM |
| 237 | 3-H08          | BML-DL353   | Chloroquine Diphosphate             | 50-63-5     | 515.9 | 10mM |
| 238 | 3-H09          | BML-T115    | Thalidomide                         | 50-35-1     | 258.2 | 10mM |
| 239 | 3-H10          | ALX-380-287 | Ciprofloxacin                       | 85721-33-1  | 331.3 | 10mM |
| 240 | 3-H11          | BML-NS112   | Citalopram·HBr                      | 59729-32-7  | 405.3 | 10mM |
| 241 | 4-A02          | BML-DL357   | Clarithromycin                      | 81103-11-9  | 748   | 10mM |
| 242 | 4-A03          | BML-DL360   | Clomiphene Citrate                  | 50-41-9     | 598.1 | 10mM |
| 243 | 4-A04          | BML-AC1290  | Clopidogrel Hydrogen Sulfate        | 135046-48-9 | 419.9 | 10mM |
| 244 | 4-A05          | BML-DL363   | Clobetasol Propionate               | 25122-46-7  | 467   | 10mM |
| 245 | 4-A06          | BML-AC1386  | Orphenadrine Citrate                | 4682-36-4   | 461.5 | 10mM |
| 246 | 4-A07          | BML-DL366   | Crotamiton                          | 483-63-6    | 203.3 | 10mM |
| 247 | 4-A08          | ALX-400-051 | Cyclophosphamide (Free Base)        | 6055-19-2   | 279.1 | 10mM |
| 248 | 4-A09          | BML-DL370   | Cytarabine                          | 147-94-4    | 243.2 | 10mM |
| 249 | 4-A10          | BML-DL371   | Dacarbazine                         | 4342-03 4   | 182.2 | 10mM |
| 250 | 4-A11          | BML-DL372   | Danazol                             | 17230-88-5  | 337.5 | 10mM |
| 251 | 4-B02          | BML-DL154   | Desloratadine                       | 100643-71-8 | 310.8 | 10mM |
| 252 | 4-B03          | BML-DL374   | Dextromethorphan                    | 125-71-3    | 271.4 | 10mM |
| 253 | 4-B04          | BML-DL375   | Diclofenac·Na Salt                  | 15307-79-6  | 318.3 | 10mM |
| 254 | 4-B05          | BML-DL376   | Zalcitabine (2',3'-Dideoxycytidine) | 7481-89-2   | 211.2 | 10mM |
| 255 | 4-B06          | BML-DL378   | Diflunisal                          | 22494-42-4  | 250.2 | 10mM |
| 256 | 4-B07          | BML-DL379   | Disulfiram                          | 97-77-8     | 296.5 | 10mM |
| 257 | 4-B08          | BML-DL204   | Doxazosin Mesylate                  | 77883-43-3  | 547.6 | 10mM |
| 258 | 4-B09          | BML-DL381   | Doxycycline Monohydrate             | 17086-28-1  | 460.9 | 10mM |
| 259 | 4-B10          | BML-PI152   | Enalapril                           | 75847-73-3  | 376.5 | 10mM |
| 260 | 4-B11          | BML-DL386   | Esomeprazole Potassium              | 161796-84-5 | 383.5 | 10mM |
| 261 | 4-C02          | BML-BL093   | Estradiol                           | 50-28-2     | 272.4 | 10mM |
| 262 | 4-C03          | BML-BL090   | Estrone                             | 53-16-7     | 270.4 | 10mM |
| 263 | 4-C04          | BML-DL390   | Etidronate Disodium                 | 7414-83-7   | 250   | 10mM |
| 264 | 4-C05          | BML-DL392   | Famciclovir                         | 104227-87-4 | 321.3 | 10mM |
| 265 | 4-C06          | BML-DL395   | Fenoldopam Mesylate                 | 67227-57-0  | 401.9 | 10mM |
| 266 | 4-C07          | BML-DL396   | Fenoprofen Calcium                  | 53746-45-5  | 558.6 | 10mM |
| 267 | 4-C08          | ALX-270-481 | Fenofibrate                         | 49562-28-9  | 360.8 | 10mM |
| 268 | 4-C09          | ALX-270-491 | Finasteride                         | 98319-26-7  | 372.5 | 10mM |
| 269 | 4-C10          | ALX-480-099 | Fluorouracil (5-Fluorouracil)       | 51-21-8     | 130.1 | 10mM |
| 270 | 4-C11          | BML-DL400   | Flurbiprofen                        | 5104-49-4   | 244.3 | 10mM |
| 271 | 4-D02          | BML-DL581   | Amitriptyline·HCl                   | 549-18-8    | 313.9 | 10mM |
| 272 | 4-D03          | BML-DL403   | Floxuridine                         | 50-91-9     | 246.2 | 10mM |
| 273 | 4-D04          | BML-DL404   | Fluocinolone Acetonide              | 67-73-2     | 452.5 | 10mM |
| 274 | 4-D05          | BML-DL406   | Flutamide                           | 13311-84-7  | 276.2 | 10mM |
| 275 | 4-D06          | BML-DL407   | Fluconazole                         | 86386-73-4  | 306.3 | 10mM |
| 276 | 4-D07          | BML-DL410   | Furosemide                          | 54-31-9     | 330.7 | 10mM |
| 277 | 4-D08          | BML-DL411   | Ganciclovir                         | 82410-32-0  | 255.2 | 10mM |
| 278 | 4-D09          | ALX-380-291 | Gatifloxacin                        | 112811-59-3 | 375.4 | 10mM |
| 279 | 4-D10          | BML-DL413   | Gentamycin Sulfate                  | 1405-41-0   | 570   | 10mM |
| 280 | 4-D11          | BML-DL414   | Gemfibrozil                         | 25812-30-0  | 250.3 | 10mM |
| 281 | 4-E02          | BML-DL416   | Glimepiride                         | 93479-97-1  | 490.6 | 10mM |
| 282 | 4-E03          | BML-DL419   | Hydrocortisone                      | 50-23-7     | 362.5 | 10mM |
| 283 | 4-E04          | BML-DL420   | Hydrocortisone Acetate              | 50-03-3     | 404.5 | 10mM |
| 284 | 4-E05          | BML-DL422   | Idoxuridine                         | 54-42-2     | 354.1 | 10mM |
| 285 | 4-E06          | BML-DL423   | Ifosfamide                          | 3778-73-2   | 261.1 | 10mM |
| 286 | 4-E07          | ALX-420-039 | Imiquimod                           | 99011-02-6  | 240.3 | 10mM |
| 287 | 4-E08          | BML-DL425   | Indapamide                          | 26807-65-8  | 365.8 | 10mM |
| 288 | 4-E09          | BML-DL427   | Itraconazole                        | 84625-61-6  | 705.6 | 10mM |
| 289 | 4-E10          | BML-DL430   | Levonorgestrel                      | 797-63-7    | 312.4 | 10mM |
| 290 | 4-E11          | ALX-380-292 | Levofloxacin·HCl                    | 177325-13-2 | 415.8 | 10mM |
| 291 | 4-F02          | ALX-430-095 | Leflunomide                         | 75706-12-6  | 270.2 | 10mM |
| 292 | 4-F03          | BML-DL434   | Lisinopril·2H2O                     | 83915-83-7  | 441.5 | 10mM |

| #   | Plate Location | Cat No.     | Name                                        | CAS #       | MW     | Conc |
|-----|----------------|-------------|---------------------------------------------|-------------|--------|------|
| 293 | 4-F04          | BML-DL436   | Loratadine                                  | 79794-75-5  | 382.9  | 10mM |
| 294 | 4-F05          | BML-DL438   | Losartan Potassium                          | 124750-99-8 | 461    | 10mM |
| 295 | 4-F06          | BML-DL439   | Mebendazole                                 | 31431-39-7  | 295.3  | 10mM |
| 296 | 4-F07          | BML-DL440   | Medroxyprogesterone Acetate                 | 71-58-9     | 386.5  | 10mM |
| 297 | 4-F08          | BML-DL441   | Mefenamic Acid                              | 61-68-7     | 241.3  | 10mM |
| 298 | 4-F09          | BML-DL442   | Melphalan                                   | 148-82-3    | 305.2  | 10mM |
| 299 | 4-F10          | ALX-550-528 | Methyldopa Sesquihydrate (L- A -Methyl-Dopa | 41372-08-1  | 238.2  | 10mM |
| 300 | 4-F11          | BML-DL444   | Methylprednisolone                          | 83-43-2     | 374.5  | 10mM |
| 301 | 4-G02          | BML-DL445   | Metoprolol Tartrate                         | 56392-17-7  | 684.8  | 10mM |
| 302 | 4-G03          | BML-DL446   | Methimazole                                 | 60-56-0     | 114.2  | 10mM |
| 303 | 4-G04          | BML-DL447   | Metronidazole                               | 443-48-1    | 171.2  | 10mM |
| 304 | 4-G05          | BML-DL449   | Minocycline                                 | 10118-90-8  | 437.48 | 10mM |
| 305 | 4-G06          | ALX-400-050 | Mitoxantrone·HCl                            | 70476-82-3  | 517.4  | 10mM |
| 306 | 4-G07          | BML-T104    | Paclitaxel (Taxol)                          | 33069-62-4  | 853.9  | 10mM |
| 307 | 4-G08          | BML-DL454   | Nabumetone                                  | 42924-53-8  | 228.3  | 10mM |
| 308 | 4-G09          | BML-DL455   | Naphazoline·HCl                             | 550-99-2    | 246.7  | 10mM |
| 309 | 4-G10          | BML-DL456   | Nefazodone·HCl                              | 82752-99-6  | 506.5  | 10mM |
| 310 | 4-G11          | BML-DL458   | Norethindrone                               | 68-22-4     | 298.4  | 10mM |
| 311 | 4-H02          | ALX-380-295 | Norfloxacin                                 | 70458-96-7  | 319.3  | 10mM |
| 312 | 4-H03          | BML-DL460   | Nystatin                                    | 1400-61-9   | 926.1  | 10mM |
| 313 | 4-H04          | ALX-380-297 | Ofloxacin                                   | 82419-36-1  | 361.4  | 10mM |
| 314 | 4-H05          | BML-DL462   | Omeprazole                                  | 73590-58-6  | 345.4  | 10mM |
| 315 | 4-H06          | BML-DL463   | Oxcarbazepine                               | 28721-07-5  | 252.3  | 10mM |
| 316 | 4-H07          | BML-DL464   | Oxiconazole Nitrate                         | 64211-46-7  | 492.2  | 10mM |
| 317 | 4-H08          | BML-DL465   | Oxacillin·Na                                | 7240-38-2   | 441.4  | 10mM |
| 318 | 4-H09          | BML-DL468   | Pantoprazole                                | 102625-70-7 | 383.4  | 10mM |
| 319 | 4-H10          | BML-NS710   | Paroxetine·HCl                              | 78246-49-8  | 365.8  | 10mM |
| 320 | 4-H11          | BML-DL472   | Penciclovir                                 | 39809-25-1  | 253.3  | 10mM |
| 321 | 5-A02          | ALX-270-112 | Pentoxifylline                              | 6493-05-6   | 278.3  | 10mM |
| 322 | 5-A03          | BML-DL474   | Penicillin V Potassium                      | 132-98-9    | 388.5  | 10mM |
| 323 | 5-A04          | BML-DL476   | Piperacillin                                | 61477-96-1  | 517.6  | 10mM |
| 324 | 5-A05          | BML-DL479   | Prednisolone                                | 50-24-8     | 360.4  | 10mM |
| 325 | 5-A06          | BML-DL480   | Progesterone                                | 57-83-0     | 314.5  | 10mM |
| 326 | 5-A07          | BML-DL481   | Procarbazine·HCl                            | 366-70-1    | 257.8  | 10mM |
| 327 | 5-A08          | BML-DL483   | Prednisone                                  | 53-03-2     | 358.4  | 10mM |
| 328 | 5-A09          | BML-DL485   | Primaquine Phosphate                        | 63-45-6     | 455.3  | 10mM |
| 329 | 5-A10          | BML-DL486   | Praziquantel                                | 55268-74-1  | 312.4  | 10mM |
| 330 | 5-A11          | BML-DL489   | Quinapril·HCl                               | 82586-55-8  | 475    | 10mM |
| 331 | 5-B02          | BML-DL490   | Ranolazine·2HCl                             | 95635-56-6  | 500.5  | 10mM |
| 332 | 5-B03          | BML-DL491   | Ramipril                                    | 87333-19-5  | 416.5  | 10mM |
| 333 | 5-B04          | BML-DL492   | Ribavirin                                   | 36791-04-5  | 441.4  | 10mM |
| 334 | 5-B05          | BML-DL566   | Nelfinavir Mesylate                         | 159989-65-8 | 663.9  | 10mM |
| 335 | 5-B06          | BML-DL494   | Rimantadine·HCl                             | 1501-84-4   | 179.3  | 10mM |
| 336 | 5-B07          | BML-ST405   | Propranolol·HCl                             | 318-98-9    | 295.8  | 10mM |
| 337 | 5-B08          | ALX-550-094 | Scopolamine·HBr                             | 114-49-8    | 438.3  | 10mM |
| 338 | 5-B09          | BML-DL504   | Spironolactone                              | 52-01-7     | 416.6  | 10mM |
| 339 | 5-B10          | ALX-380-277 | Streptomycin Sulfate                        | 3810-74-0   | 1457.4 | 10mM |
| 340 | 5-B11          | BML-DL508   | Sulfadiazine                                | 68-35-9     | 250.3  | 10mM |
| 341 | 5-C02          | BML-DL510   | Sulfasalazine                               | 599-79-1    | 398.4  | 10mM |
| 342 | 5-C03          | BML-DL160   | Tamsulosin·HCl                              | 106463-17-6 | 445    | 10mM |
| 343 | 5-C04          | BML-DL511   | Telmisartan                                 | 144701-48-4 | 514.6  | 10mM |
| 344 | 5-C05          | BML-DL513   | Terazosin·HCl                               | 63590-64-7  | 423.9  | 10mM |
| 345 | 5-C06          | BML-DL514   | Tetracycline                                | 60-54-8     | 444.4  | 10mM |
| 346 | 5-C07          | ALX-420-044 | Temozolomide                                | 85622-93-1  | 194.2  | 10mM |
| 347 | 5-C08          | BML-DL516   | Tinidazole                                  | 19387-91-8  | 247.3  | 10mM |
| 348 | 5-C09          | ALX-380-018 | Tobramycin                                  | 32986-56-4  | 467.5  | 10mM |
| 349 | 5-C10          | ALX-350-133 | Topotecan·HCl                               | 119413-54-6 | 457.9  | 10mM |
| 350 | 5-C11          | BML-DL519   | Toremifene Base                             | 89778-26-7  | 406    | 10mM |
| 351 | 5-D02          | BML-DL521   | Tolmetin·Na                                 | 64490-92-2  | 315.3  | 10mM |



| #   | Plate Location | Cat No.     | Name                                       | CAS #       | MW    | Conc |
|-----|----------------|-------------|--------------------------------------------|-------------|-------|------|
| 352 | 5-D03          | BML-DL582   | Amoxicillin                                | 26787-78-0  | 365.4 | 10mM |
| 353 | 5-D04          | BML-DL523   | Tramadol·HCl                               | 22204-88-2  | 299.8 | 10mM |
| 354 | 5-D05          | BML-DL525   | Trimethoprim                               | 738-70-5    | 290.3 | 10mM |
| 355 | 5-D06          | BML-DL527   | Valacyclovir·HCl                           | 124832-27-5 | 360.8 | 10mM |
| 356 | 5-D07          | BML-DL528   | Vecuronium Bromide                         | 50700-72-6  | 637.7 | 10mM |
| 357 | 5-D08          | BML-NS114   | Venlafaxine·HCl                            | 99300-78-4  | 313.9 | 10mM |
| 358 | 5-D09          | BML-NA139   | Bupivacaine·HCl                            | 14252-80-3  | 324.9 | 10mM |
| 359 | 5-D10          | BML-NH106   | Ketotifen Fumarate                         | 34580-14-8  | 425.5 | 10mM |
| 360 | 5-D11          | ALX-550-055 | Naloxone·HCl                               | 357-08-4    | 363.9 | 10mM |
| 361 | 5-E02          | BML-NS140   | Fluoxetine·HCl                             | 56296-78-7  | 345.8 | 10mM |
| 362 | 5-E03          | BML-NS145   | Ondansetron                                | 116002-70-1 | 293.4 | 10mM |
| 363 | 5-E04          | BML-DL562   | Tiotropium Bromide Monohydrate             | 136310-93-5 | 472.4 | 10mM |
| 364 | 5-E05          | BML-NS835   | Thioridazine·HCl                           | 130-61-0    | 407   | 10mM |
| 365 | 5-E06          | BML-DL583   | Amrinone                                   | 60719-84-8  | 187.2 | 10mM |
| 366 | 5-E07          | ALX-270-083 | Milrinone                                  | 78415-72-2  | 211.2 | 10mM |
| 367 | 5-E08          | BML-PG006   | Alprostadil                                | 745-65-3    | 354.5 | 10mM |
| 368 | 5-E09          | BML-PG051   | Misoprostol                                | 59122-46-2  | 382.5 | 10mM |
| 369 | 5-E10          | BML-PI146   | Argatroban                                 | 74863-84-6  | 508.6 | 10mM |
| 370 | 5-E11          | BML-PI153   | Cilastatin·Na                              | 81129-83-1  | 380.4 | 10mM |
| 371 | 5-F02          | BML-DL584   | Butoconazole Nitrate                       | 64872-77-1  | 474.8 | 10mM |
| 372 | 5-F03          | BML-S510    | Mifepristone                               | 84371-65-3  | 429.6 | 10mM |
| 373 | 5-F04          | BML-S515    | Megestrol Acetate                          | 595-33-5    | 384.5 | 10mM |
| 374 | 5-F05          | ALX-550-095 | Tamoxifen Citrate                          | 54965-24-1  | 563.6 | 10mM |
| 375 | 5-F06          | BML-DL533   | Aprepitant                                 | 170729-80-3 | 534.4 | 10mM |
| 376 | 5-F07          | BML-DL534   | Bosentan                                   | 147536-97-8 | 551.7 | 10mM |
| 377 | 5-F08          | BML-DL535   | Efavirenz                                  | 154598-52-4 | 315.7 | 10mM |
| 378 | 5-F09          | BML-SL230   | Miglustat (N-Butyldeoxynojirimycin·HCl)    | 210110-90-0 | 255.7 | 10mM |
| 379 | 5-F10          | BML-DL104   | Fulvestrant                                | 129453-61-8 | 606.8 | 10mM |
| 380 | 5-F11          | BML-DL107   | Esmolol                                    | 103598-03-4 | 295.4 | 10mM |
| 381 | 5-G02          | BML-DL585   | Capecitabine                               | 154361-50-9 | 359.4 | 10mM |
| 382 | 5-G03          | BML-DL234   | Succinylcholine Chloride·2H <sub>2</sub> O | 6101-15-1   | 397.3 | 10mM |
| 383 | 5-G04          | BML-DL136   | Cyproheptadine·HCl Sesquihydrate           | 41354-29-4  | 350.9 | 10mM |
| 384 | 6-A02          | BML-AC2300  | Abacavir Sulfate                           | 188062-50-2 | 286.3 | 10mM |
| 385 | 6-A03          | BML-AC3000  | Acamprosate                                | 77337-73-6  | 181.2 | 10mM |
| 386 | 6-A04          | BML-AC2310  | Acarbose                                   | 56180-94-0  | 645.6 | 10mM |
| 387 | 6-A05          | BML-AC2003  | Acebutolol·HCl                             | 34381-68-5  | 372.9 | 10mM |
| 388 | 6-A06          | BML-AC2337  | Acetaminophen                              | 103-90-2    | 151.2 | 10mM |
| 389 | 6-A07          | BML-AC3001  | Acetazolamide                              | 59-66-5     | 222.3 | 10mM |
| 390 | 6-A08          | BML-AC3002  | Acetohexamide                              | 968-81-0    | 324.4 | 10mM |
| 391 | 6-A09          | BML-AC3003  | Acetohydroxamic Acid                       | 546-88-3    | 75.1  | 10mM |
| 392 | 6-A10          | BML-AC3004  | Acetylcysteine                             | 616-91-1    | 163.2 | 10mM |
| 393 | 6-A11          | BML-AC3005  | Acrivastine                                | 87848-99-5  | 348.4 | 2mM  |
| 394 | 6-B02          | BML-AC3006  | Adefovir Dipivoxil                         | 142340-99-6 | 501.5 | 10mM |
| 395 | 6-B03          | BML-AC589   | Adenosine                                  | 58-61-7     | 267.2 | 10mM |
| 396 | 6-B04          |             | Blank                                      |             |       |      |
| 397 | 6-B05          | BML-AC3008  | Alitretinoin                               | 5300-03-8   | 300.4 | 10mM |
| 398 | 6-B06          | BML-AC3009  | Almotriptan                                | 181183-52-8 | 335.5 | 10mM |
| 399 | 6-B07          | BML-AC3010  | Alosetron·HCl                              | 122852-69-1 | 294.4 | 10mM |
| 400 | 6-B08          |             | Blank                                      |             |       |      |
| 401 | 6-B09          | BML-AC3012  | Ambrisentan                                | 177036-94-1 | 378.4 | 10mM |
| 402 | 6-B10          | BML-AC3013  | Aminonide                                  | 51022-69-6  | 502.6 | 10mM |
| 403 | 6-B11          | ALX-380-266 | Amikacin Disulfate                         | 39831-55-5  | 781.8 | 10mM |
| 404 | 6-C02          | BML-AC3014  | Aminocaproic Acid                          | 60-32-2     | 131.2 | 10mM |
| 405 | 6-C03          | BML-AC3015  | Aminohippurate·Na                          | 94-16-6     | 216.2 | 10mM |
| 406 | 6-C04          | BML-AC3016  | Aminolevulinic Acid·HCl                    | 5451-09-2   | 167.6 | 10mM |
| 407 | 6-C05          | BML-AC3017  | Amlexanox                                  | 68302-57-8  | 298.3 | 10mM |
| 408 | 6-C06          | ALX-380-280 | Amphotericin B                             | 1397-89-3   | 924.1 | 10mM |
| 409 | 6-C07          | BML-AC2011  | Arsenic Trioxide                           | 1327-53-3   | 197.8 | 10mM |
| 410 | 6-C08          | BML-AC3019  | Artemether                                 | 71963-77-4  | 298.4 | 10mM |

| #   | Plate Location | Cat No.     | Name                                   | CAS #       | MW     | Conc |
|-----|----------------|-------------|----------------------------------------|-------------|--------|------|
| 411 | 6-C09          | BML-AC3020  | Articaine·HCl                          | 23964-57-0  | 320.8  | 10mM |
| 412 | 6-C10          | ALX-460-001 | L-Ascorbic Acid                        | 50-81-7     | 176    | 10mM |
| 413 | 6-C11          | BML-AC3021  | Asenapine Maleate                      | 85650-56-2  | 401.8  | 10mM |
| 414 | 6-D02          | BML-AC3022  | Atomoxetine·HCl                        | 82248-59-7  | 291.8  | 10mM |
| 415 | 6-D03          | BML-AC3023  | Atorvastatin Calcium                   | 134523-03-8 | 577.7  | 10mM |
| 416 | 6-D04          | BML-AC3024  | Azacitidine                            | 320-67-2    | 244.2  | 10mM |
| 417 | 6-D05          | BML-AC3025  | Azelaic Acid                           | 123-99-9    | 188.2  | 10mM |
| 418 | 6-D06          | BML-AC3026  | Azelastine·HCl                         | 79307-93-0  | 418.4  | 10mM |
| 419 | 6-D07          | BML-AC3027  | Bacitracin                             | 1405-87-4   | 1422.7 | 10mM |
| 420 | 6-D08          | BML-EA128   | Baclofen                               | 1134-47-0   | 213.7  | 10mM |
| 421 | 6-D09          | BML-AC3028  | Balsalazide                            | 80573-04-2  | 354.3  | 10mM |
| 422 | 6-D10          | BML-AC3029  | Beclomethasone Dipropionate            | 5534-09-8   | 521    | 10mM |
| 423 | 6-D11          | BML-AC3030  | Benazepril·HCl                         | 86541-74-4  | 461    | 10mM |
| 424 | 6-E02          | BML-AC1523  | Bendamustine·HCl                       | 3543-75-7   | 394.7  | 10mM |
| 425 | 6-E03          | BML-AC3031  | Bendroflumethiazide                    | 73-48-3     | 421.4  | 10mM |
| 426 | 6-E04          | ALX-550-143 | Benzotropine Mesylate                  | 132-17-2    | 403.5  | 10mM |
| 427 | 6-E05          | BML-AC3032  | Betaine                                | 107-43-7    | 117.2  | 10mM |
| 428 | 6-E06          | BML-AC3033  | Bethanechol Chloride                   | 590-63-6    | 196.7  | 10mM |
| 429 | 6-E07          | BML-RA121   | Bimatoprost                            | 155206-00-1 | 415.6  | 10mM |
| 430 | 6-E08          | BML-AC3034  | Biperiden·HCl                          | 1235-82-1   | 347.9  | 10mM |
| 431 | 6-E09          | BML-AC3035  | Bisoprolol Fumarate                    | 104344-23-2 | 767    | 10mM |
| 432 | 6-E10          | BML-AC3036  | Brimonidine                            | 59803-98-4  | 292.1  | 10mM |
| 433 | 6-E11          | BML-AC3037  | Bromfenac                              | 91714-94-2  | 334.2  | 10mM |
| 434 | 6-F02          | BML-AC3038  | Brompheniramine Maleate                | 980-71-2    | 435.3  | 10mM |
| 435 | 6-F03          | BML-AC3039  | Budesonide                             | 51333-22-3  | 430.5  | 10mM |
| 436 | 6-F04          | BML-AC2606  | Bupropion                              | 34911-55-2  | 239.7  | 10mM |
| 437 | 6-F05          | ALX-400-048 | Busulfan                               | 55-98-1     | 246.3  | 10mM |
| 438 | 6-F06          | BML-AC3040  | Butorphanol-(+)-Tartrate (Schedule Iv) | 58786-99-5  | 477.6  | 10mM |
| 439 | 6-F07          | BML-NP042   | Capreomycin Sulfate                    | 1405-36-3   | 750.8  | 10mM |
| 440 | 6-F08          | BML-AC3041  | Carbinoxamine Maleate                  | 3505-38-2   | 406.9  | 10mM |
| 441 | 6-F09          | BML-AC3042  | Carglumic Acid                         | 1188-38-1   | 190.2  | 10mM |
| 442 | 6-F10          |             | Blank                                  |             |        |      |
| 443 | 6-F11          | BML-AC2600  | Carmustine                             | 154-93-8    | 214.1  | 10mM |
| 444 | 6-G02          | ALX-380-016 | Cefaclor                               | 53994-73-3  | 367.8  | 10mM |
| 445 | 6-G03          | BML-AC3044  | Cefadroxil                             | 66592-87-8  | 363.4  | 10mM |
| 446 | 6-G04          | ALX-380-444 | Cefazolin·Na                           | 27164-46-1  | 476.5  | 10mM |
| 447 | 6-G05          | BML-AC3045  | Cefdinir                               | 91832-40-5  | 395.4  | 10mM |
| 448 | 6-G06          | BML-AC3046  | Cefditoren Pivoxil                     | 117467-28-4 | 620.7  | 10mM |
| 449 | 6-G07          | BML-AC3047  | Cefixime                               | 79350-37-1  | 453.5  | 10mM |
| 450 | 6-G08          | BML-AC3048  | Cefotetan Disodium                     | 74356-00-6  | 619.6  | 10mM |
| 451 | 6-G09          | BML-AC3049  | Cefoxitin·Na                           | 33564-30-6  | 449.4  | 10mM |
| 452 | 6-G10          | BML-AC3050  | Cefpodoxime Proxetil                   | 87239-81-4  | 557.6  | 10mM |
| 453 | 6-G11          | BML-AC3051  | Cefprozil                              | 92665-29-7  | 389.4  | 10mM |
| 454 | 6-H02          | BML-AC3052  | Ceftibuten                             | 97519-39-6  | 410.4  | 10mM |
| 455 | 6-H03          | BML-AC3053  | Ceftizoxim·Na                          | 68401-82-1  | 405.4  | 10mM |
| 456 | 6-H04          | BML-AC3054  | Ceftriaxone·Na                         | 104376-79-6 | 598.6  | 10mM |
| 457 | 6-H05          | BML-AC3055  | Cefuroxime Axetil                      | 64544-07-6  | 510.5  | 10mM |
| 458 | 6-H06          | BML-AC3056  | Cefuroxime·Na                          | 56238-63-2  | 446.4  | 10mM |
| 459 | 6-H07          | BML-AC3057  | Cephalexin Monohydrate                 | 15686-71-2  | 365.4  | 10mM |
| 460 | 6-H08          | BML-BL053   | Chenodiol (Chenodeoxycholic Acid)      | 474-25-9    | 392.6  | 10mM |
| 461 | 6-H09          |             | Blank                                  |             |        |      |
| 462 | 6-H10          | BML-AC3059  | Chlorhexidine Dihydrochloride          | 3697-42-5   | 578.4  | 10mM |
| 463 | 6-H11          | ALX-500-086 | Chlorothiazide                         | 58-94-6     | 295.7  | 10mM |
| 464 | 7-A02          | BML-AC3060  | Chlorpropamide                         | 94-20-2     | 276.7  | 10mM |
| 465 | 7-A03          | BML-AC3061  | Chlorthalidone                         | 77-36-1     | 338.8  | 10mM |
| 466 | 7-A04          | BML-AC2325  | Chlorzoxazone                          | 95-25-0     | 169.6  | 10mM |
| 467 | 7-A05          | BML-AC3062  | Ciclesonide                            | 126544-47-6 | 540.7  | 10mM |
| 468 | 7-A06          | BML-AC3063  | Ciclopirox                             | 29342-05-0  | 207.3  | 10mM |
| 469 | 7-A07          | BML-AC3064  | Cidofovir                              | 113852-37-2 | 279.2  | 10mM |



| #   | Plate Location | Cat No.     | Name                                            | CAS #       | MW     | Conc |
|-----|----------------|-------------|-------------------------------------------------|-------------|--------|------|
| 470 | 7-A08          | BML-PD127   | Cilostazol                                      | 73963-72-1  | 369.5  | 10mM |
| 471 | 7-A09          | BML-AC3065  | Cinacalcet·HCl                                  | 364782-34-3 | 393.9  | 10mM |
| 472 | 7-A10          | BML-AC3066  | Cisatracurium Besylate                          | 96946-42-8  | 1243.8 | 10mM |
| 473 | 7-A11          | ALX-400-040 | Cisplatin (Cis-Diamineplatinum(II) Dichloride ) | 15663-27-1  | 300.1  | 10mM |
| 474 | 7-B02          | BML-AC2617  | Cladribine                                      | 4291-63-8   | 285.7  | 10mM |
| 475 | 7-B03          | BML-AC3067  | Clavulanate Potassium                           | 61177-45-5  | 237.3  | 10mM |
| 476 | 7-B04          | BML-AC3068  | Clobazam                                        | 22316-47-8  | 300.7  | 10mM |
| 477 | 7-B05          | BML-AC3069  | Clofazimine                                     | 2030-63-9   | 473.4  | 10mM |
| 478 | 7-B06          | BML-AC3572  | Clomipramine·HCl                                | 17321-77-6  | 351.3  | 10mM |
| 479 | 7-B07          | BML-AC3070  | Clonazepam                                      | 1622-61-3   | 315.7  | 10mM |
| 480 | 7-B08          | BML-AC2327  | Clotrimazole                                    | 23593-75-1  | 344.8  | 10mM |
| 481 | 7-B09          | BML-AC3071  | Cloxacillin·Na                                  | 7081-44-9   | 457.9  | 10mM |
| 482 | 7-B10          | ALX-380-033 | Colchicine                                      | 64-86-8     | 399.4  | 10mM |
| 483 | 7-B11          | BML-AC3072  | Colistimethate·Na                               | 8068-28-8   | 1634.9 | 10mM |
| 484 | 7-C02          | ALX-380-272 | Colistin Sulfate                                | 1264-72-8   | 1267.6 | 10mM |
| 485 | 7-C03          | BML-AC3073  | Cortisone Acetate                               | 50-04-4     | 402.5  | 10mM |
| 486 | 7-C04          | BML-AC3074  | Cyclobenzaprine·HCl                             | 6202-23-9   | 311.9  | 10mM |
| 487 | 7-C05          | BML-AC3075  | Cyclopentolate                                  | 512-15-2    | 291.4  | 10mM |
| 488 | 7-C06          | BML-AC3076  | Cycloserine                                     | 68-41-7     | 102.1  | 10mM |
| 489 | 7-C07          | BML-AC3077  | Cysteamine·HCl                                  | 156-57-0    | 113.6  | 10mM |
| 490 | 7-C08          | BML-GR300   | Dactinomycin (= Actinomycin D)                  | 50-76-0     | 1255.4 | 10mM |
| 491 | 7-C09          | ALX-550-141 | Dalfampridine (4-Aminopyridine)                 | 504-24-5    | 94.1   | 10mM |
| 492 | 7-C10          | ALX-550-072 | Dantrolene·Na                                   | 14663-23-1  | 314.3  | 10mM |
| 493 | 7-C11          | ALX-270-090 | Dapsone                                         | 80-08-0     | 248.3  | 10mM |
| 494 | 7-D02          | BML-A201    | Daptomycin                                      | 103060-53-3 | 1620.7 | 10mM |
| 495 | 7-D03          | BML-AC3079  | Darifenacin·HBr                                 | 133099-07-7 | 426.6  | 10mM |
| 496 | 7-D04          | BML-AC3080  | Darunavir                                       | 206361-99-1 | 547.7  | 10mM |
| 497 | 7-D05          | BML-AC3081  | Dasatinib                                       | 302962-49-8 | 488    | 10mM |
| 498 | 7-D06          | BML-AC1526  | Decitabine                                      | 2353-33-5   | 228.2  | 10mM |
| 499 | 7-D07          | BML-AC3082  | Deferasirox                                     | 201530-41-8 | 373.4  | 10mM |
| 500 | 7-D08          | BML-R121    | Deferoxamine Mesylate                           | 138-14-7    | 656.8  | 10mM |
| 501 | 7-D09          | BML-AC3083  | Demeclocycline·HCl                              | 64-73-3     | 464.9  | 10mM |
| 502 | 7-D10          | BML-AR119   | Desipramine·HCl                                 | 58-28-6     | 302.8  | 10mM |
| 503 | 7-D11          | BML-AC3084  | Desogestrel                                     | 54024-22-5  | 310.5  | 10mM |
| 504 | 7-E02          | BML-AC3085  | Desonide                                        | 638-94-8    | 416.5  | 10mM |
| 505 | 7-E03          | BML-AC3086  | Desoximetasone                                  | 382-67-2    | 376.5  | 10mM |
| 506 | 7-E04          | BML-AC3087  | Desvenlafaxine Succinate Hydrate                | 386750-22-7 | 263.4  | 10mM |
| 507 | 7-E05          | BML-AC3088  | Dexchlorpheniramine Maleate                     | 2438-32-6   | 390.9  | 10mM |
| 508 | 7-E06          | BML-AC3089  | Dexmedetomidine·HCl                             | 145108-58-3 | 236.7  | 10mM |
| 509 | 7-E07          |             | Blank                                           |             |        |      |
| 510 | 7-E08          | BML-AC3091  | Dexrazoxane                                     | 24584-09-6  | 268.3  | 10mM |
| 511 | 7-E09          | BML-AC3092  | Diatrizoate Meglumine                           | 131-49-7    | 809.1  | 10mM |
| 512 | 7-E10          | BML-AC3093  | Diazepam                                        | 439-14-5    | 284.7  | 10mM |
| 513 | 7-E11          | BML-AC3094  | Dicloxacillin·Na Salt Monohydrate               | 13412-64-1  | 510.3  | 10mM |
| 514 | 7-F02          | BML-AC3095  | Dicyclomine·HCl                                 | 67-92-5     | 309.5  | 10mM |
| 515 | 7-F03          | BML-AC3096  | Dienogest                                       | 65928-58-7  | 311.4  | 10mM |
| 516 | 7-F04          |             | Blank                                           |             |        |      |
| 517 | 7-F05          | BML-AC3098  | Difluprednate                                   | 23674-86-4  | 508.6  | 10mM |
| 518 | 7-F06          | BML-AC2000  | Digoxin                                         | 20830-75-5  | 780.9  | 10mM |
| 519 | 7-F07          | BML-AC3099  | Dimenhydrinate                                  | 523-87-5    | 470    | 10mM |
| 520 | 7-F08          | BML-AC2001  | Disopyramide                                    | 3737/9/5    | 339.5  | 10mM |
| 521 | 7-F09          | BML-AC752   | Dopamine·HCl                                    | 62-31-7     | 189.6  | 10mM |
| 522 | 7-F10          | BML-AC3100  | Doripenem                                       | 148016-81-3 | 420.5  | 10mM |
| 523 | 7-F11          | BML-AC3101  | Doxapram·HCl                                    | 7081-53-0   | 378.5  | 10mM |
| 524 | 7-G02          | BML-AC2010  | Doxepin·HCl                                     | 1229-29-4   | 315.8  | 10mM |
| 525 | 7-G03          | BML-AC2008  | Droperidol                                      | 548-73-2    | 379.4  | 10mM |
| 526 | 7-G04          | BML-AC3102  | Drospirenone                                    | 67392-87-4  | 366.5  | 10mM |
| 527 | 7-G05          | BML-AC3103  | Duloxetine·HCl                                  | 136434-34-9 | 333.9  | 10mM |
| 528 | 7-G06          | BML-AC3104  | Dutasteride                                     | 164656-23-9 | 528.5  | 10mM |

| #   | Plate Location | Cat No.     | Name                                                        | CAS #       | MW     | Conc |
|-----|----------------|-------------|-------------------------------------------------------------|-------------|--------|------|
| 529 | 7-G07          | BML-AC3105  | Dyphylline                                                  | 479-18-5    | 254.2  | 10mM |
| 530 | 7-G08          | BML-AC2356  | Econazole Nitrate                                           | 24169-02-6  | 444.7  | 10mM |
| 531 | 7-G09          |             | Blank                                                       |             |        |      |
| 532 | 7-G10          | BML-AC3107  | Eflornithine·HCl                                            | 68278-23-9  | 218.6  | 10mM |
| 533 | 7-G11          | BML-AC3108  | Epinastine·HCl                                              | 108929-04-0 | 285.8  | 10mM |
| 534 | 7-H02          | BML-AC3109  | Epirubicin·HCl                                              | 56390-09-1  | 580    | 10mM |
| 535 | 7-H03          | BML-AC3110  | Eplerenone                                                  | 107724-20-9 | 414.5  | 10mM |
| 536 | 7-H04          | BML-AC3111  | Eptifibatide                                                | 188627-80-7 | 832    | 10mM |
| 537 | 7-H05          | ALX-380-274 | Erythromycin                                                | 114-07-8    | 733.9  | 10mM |
| 538 | 7-H06          | BML-AC1524  | Estramustine Phosphate·Na                                   | 52205-73-9  | 564.4  | 10mM |
| 539 | 7-H07          | BML-AC3112  | Estropipate                                                 | 7280-37-7   | 436.6  | 10mM |
| 540 | 7-H08          | BML-AC3113  | Eszopiclone                                                 | 138729-47-2 | 388.8  | 10mM |
| 541 | 7-H09          | BML-AC3114  | Ethambutol Dihydrochloride                                  | 1070-11-7   | 277.2  | 10mM |
| 542 | 7-H10          |             | Blank                                                       |             |        |      |
| 543 | 7-H11          | BML-AC2329  | Ethinyl Estradiol                                           | 57-63-6     | 296.4  | 10mM |
| 544 | 8-A02          | BML-AC3116  | Ethionamide                                                 | 536-33-4    | 166.2  | 10mM |
| 545 | 8-A03          | BML-AC3117  | Ethosuximide                                                | 77-67-8     | 141.2  | 10mM |
| 546 | 8-A04          | BML-AC3118  | Etodolac                                                    | 41340-25-4  | 287.4  | 10mM |
| 547 | 8-A05          | BML-AC3119  | Etomidate                                                   | 33125-97-2  | 244.3  | 10mM |
| 548 | 8-A06          | BML-AC3120  | Etonogestrel                                                | 54048-10-1  | 324.5  | 10mM |
| 549 | 8-A07          | BML-AC3121  | Everolimus                                                  | 159351-69-6 | 958.2  | 10mM |
| 550 | 8-A08          | BML-AC2311  | Ezetimibe                                                   | 163222-33-1 | 409.4  | 10mM |
| 551 | 8-A09          | BML-AC3122  | Febuxostat                                                  | 144060-53-7 | 316.4  | 10mM |
| 552 | 8-A10          | BML-AC3123  | Fexofenadine·HCl                                            | 153439-40-8 | 538.1  | 10mM |
| 553 | 8-A11          | BML-AC3124  | Fingolimod                                                  | 162359-55-9 | 343.9  | 10mM |
| 554 | 8-B02          | BML-AC3125  | Flavoxate·HCl                                               | 3717-88-2   | 427.9  | 10mM |
| 555 | 8-B03          | BML-AC3126  | Flucytosine                                                 | 2022-85-7   | 129.1  | 10mM |
| 556 | 8-B04          | BML-AC2615  | Fludarabine Phosphate                                       | 75607-67-9  | 365.2  | 10mM |
| 557 | 8-B05          | BML-AC3127  | Fludrocortisone Acetate                                     | 514-36-3    | 422.5  | 10mM |
| 558 | 8-B06          | BML-AC3128  | Flunisolide                                                 | 3385-03-3   | 434.5  | 10mM |
| 559 | 8-B07          | BML-AC3129  | Fluocinonide                                                | 356-12-7    | 494.5  | 10mM |
| 560 | 8-B08          | BML-AC3130  | Fluorometholone                                             | 426-13-1    | 376.5  | 10mM |
| 561 | 8-B09          | BML-AC3131  | Flurandrenolide                                             | 1524-88-5   | 436.5  | 10mM |
| 562 | 8-B10          |             | Blank                                                       |             |        |      |
| 563 | 8-B11          | BML-AC3133  | Fluticasone Propionate                                      | 80474-14-2  | 500.6  | 10mM |
| 564 | 8-C02          | BML-AC325   | Fluvoxamine Maleate                                         | 61718-82-9  | 434.4  | 10mM |
| 565 | 8-C03          | BML-AC3134  | Fomepizole                                                  | 7554-65-6   | 82.1   | 10mM |
| 566 | 8-C04          | BML-AC3135  | Formoterol                                                  | 73573-87-2  | 344.4  | 10mM |
| 567 | 8-C05          | BML-AC3136  | Foscarnet·Na (Sodium Phosphonoformate Tribasic Hexahydrate) | 34156-56-4  | 300    | 10mM |
| 568 | 8-C06          | BML-AC3137  | Fosfomycin Calcium                                          | 26016-98-8  | 176.1  | 10mM |
| 569 | 8-C07          | BML-AC3138  | Fosphenytoin·Na Pentahydrate                                | 92134-98-0  | 496.3  | 10mM |
| 570 | 8-C08          | BML-AC3139  | Gemifloxacin                                                | 175463-14-6 | 389.4  | 10mM |
| 571 | 8-C09          | BML-AC3140  | Glycopyrrolate Iodide                                       | 873295-32-0 | 445.3  | 10mM |
| 572 | 8-C10          | BML-NP119   | Griseofulvin                                                | 126-07-8    | 352.8  | 10mM |
| 573 | 8-C11          | BML-AC3141  | Guanidine·HCl                                               | 50-01-1     | 95.5   | 10mM |
| 574 | 8-D02          | BML-AC3142  | Halcinonide                                                 | 3093-35-4   | 455    | 10mM |
| 575 | 8-D03          | BML-AC3143  | Halobetasol Propionate                                      | 66852-54-8  | 485    | 10mM |
| 576 | 8-D04          | BML-AC1549  | Hexachlorophene                                             | 70-30-4     | 406.9  | 10mM |
| 577 | 8-D05          | BML-AC3144  | Homatropine Methylbromide                                   | 80-49-9     | 370.3  | 10mM |
| 578 | 8-D06          | BML-AC2012  | Hydralazine·HCl                                             | 304-20-1    | 196.6  | 10mM |
| 579 | 8-D07          | BML-AC3145  | Hydrochlorothiazide                                         | 58-93-5     | 297.7  | 10mM |
| 580 | 8-D08          | BML-AC3146  | Hydroflumethiazide                                          | 135-09-1    | 331.3  | 10mM |
| 581 | 8-D09          | BML-AC3147  | Hydroxocobalamin·HCl                                        | 58288-50-9  | 1382.8 | 10mM |
| 582 | 8-D10          | BML-AC3148  | Hydroxychloroquine Sulfate                                  | 747-36-4    | 434    | 10mM |
| 583 | 8-D11          | BML-AC3149  | Hydroxyurea                                                 | 127-07-1    | 76.1   | 10mM |
| 584 | 8-E02          | BML-AC1559  | Hydroxyzine Dihydrochloride                                 | 2192-20-3   | 447.8  | 10mM |
| 585 | 8-E03          | BML-AC3150  | Ibutilide Fumarate                                          | 122647-32-9 | 500.7  | 10mM |
| 586 | 8-E04          | BML-AC3151  | Iloperidone                                                 | 133454-47-4 | 426.5  | 10mM |

| #   | Plate Location | Cat No.     | Name                                                     | CAS #       | MW    | Conc |
|-----|----------------|-------------|----------------------------------------------------------|-------------|-------|------|
| 587 | 8-E05          | BML-AC2017  | Indinavir                                                | 150378-17-9 | 613.8 | 10mM |
| 588 | 8-E06          | BML-AC2613  | Irbesartan                                               | 138402-11-6 | 428.5 | 10mM |
| 589 | 8-E07          | ALX-430-139 | Irinotecan·HCl                                           | 100286-90-6 | 677.2 | 10mM |
| 590 | 8-E08          | BML-AC3152  | Isocarboxazid                                            | 59-63-2     | 231.3 | 10mM |
| 591 | 8-E09          | ALX-400-008 | Isosorbide Dinitrate                                     | 87-33-2     | 236.1 | 10mM |
| 592 | 8-E10          | BML-GR102   | Isotretinoin (13-Cis-Retinoic Acid)                      | 4759-48-2   | 300.4 | 10mM |
| 593 | 8-E11          | BML-CA213   | Isradipine                                               | 75695-93-1  | 371.4 | 10mM |
| 594 | 8-F02          | ALX-380-049 | Kanamycin Sulfate                                        | 25389-94-0  | 582.6 | 10mM |
| 595 | 8-F03          | BML-AC3153  | Ketorolac Tromethamine                                   | 74103-07-4  | 376.4 | 10mM |
| 596 | 8-F04          | BML-AC2359  | Labetalol·HCl                                            | 32780-64-6  | 364.9 | 10mM |
| 597 | 8-F05          | ALX-550-527 | Lacosamide                                               | 175481-36-4 | 250.3 | 10mM |
| 598 | 8-F06          | BML-AC3154  | Lactulose                                                | 4618-18-2   | 342.3 | 10mM |
| 599 | 8-F07          | BML-AC2301  | Lamivudine                                               | 134678-17-4 | 229.3 | 10mM |
| 600 | 8-F08          | BML-AC3155  | Lansoprazole                                             | 103577-45-3 | 369.4 | 10mM |
| 601 | 8-F09          | BML-AC2604  | Lenalidomide                                             | 191732-72-6 | 259.3 | 10mM |
| 602 | 8-F10          | BML-AC3156  | Leucovorin Calcium Pentahydrate                          | 6035-45-6   | 601.6 | 10mM |
| 603 | 8-F11          | BML-AC3157  | Levalbuterol·HCl                                         | 50293-90-8  | 275.8 | 10mM |
| 604 | 8-G02          | BML-AC3158  | Levobunolol·HCl                                          | 27912-14-7  | 327.9 | 10mM |
| 605 | 8-G03          | BML-AC3159  | Levocarnitine                                            | 541-15-1    | 161.2 | 10mM |
| 606 | 8-G04          | BML-AC3160  | Levocetirizine Dihydrochloride                           | 130018-87-0 | 461.8 | 10mM |
| 607 | 8-G05          | BML-AC3161  | Levothyroxine·Na                                         | 55-03-8     | 798.9 | 10mM |
| 608 | 8-G06          | BML-AC2612  | Lindane                                                  | 58-89-9     | 290.8 | 10mM |
| 609 | 8-G07          | BML-AC3162  | Liothyronine·Na                                          | 55-06-1     | 673   | 10mM |
| 610 | 8-G08          | BML-AC3163  | Lopinavir                                                | 192725-17-0 | 628.8 | 10mM |
| 611 | 8-G09          | BML-AC3164  | Lorazepam                                                | 846-49-1    | 321.2 | 10mM |
| 612 | 8-G10          | BML-AC3165  | Loteprednol Etabonate                                    | 82034-46-6  | 467   | 10mM |
| 613 | 8-G11          | BML-AC1561  | Loxapine Succinate                                       | 27833-64-3  | 445.9 | 10mM |
| 614 | 8-H02          | BML-AC3166  | Mafenide·HCl                                             | 138-37-4    | 222.7 | 10mM |
| 615 | 8-H03          | BML-AC3167  | Malathion                                                | 121-75-5    | 330.4 | 10mM |
| 616 | 8-H04          | BML-AC3168  | Mannitol                                                 | 69-65-8     | 182.2 | 10mM |
| 617 | 8-H05          | BML-AC3169  | Maraviroc                                                | 376348-65-1 | 513.7 | 10mM |
| 618 | 8-H06          | BML-AC3170  | Mechlorethamine·HCl                                      | 55-86-7     | 192.5 | 10mM |
| 619 | 8-H07          | BML-AC3171  | Mecizine Dihydrochloride                                 | 1104-22-9   | 463.9 | 10mM |
| 620 | 8-H08          | BML-EI163   | Meclofenamate·Na                                         | 6385-02-0   | 318.1 | 10mM |
| 621 | 8-H09          | BML-AC2020  | Mefloquine·HCl                                           | 51773-92-3  | 414.8 | 10mM |
| 622 | 8-H10          | BML-AC3172  | Mepenzolate Bromide                                      | 76-90-4     | 340.4 | 10mM |
| 623 | 8-H11          | BML-AC3173  | Mepivacaine·HCl                                          | 1722-62-9   | 282.8 | 10mM |
| 624 | 9-A02          | BML-AC3174  | Meprobamate (Schedule Iv)                                | 57-53-4     | 218.3 | 10mM |
| 625 | 9-A03          | BML-AC3175  | Mequinol                                                 | 150-76-5    | 124.1 | 10mM |
| 626 | 9-A04          | BML-AC2360  | Mercaptopurine Hydrate                                   | 6112-76-1   | 170.2 | 10mM |
| 627 | 9-A05          | BML-AC3176  | Mesna                                                    | 19767-45-4  | 164.2 | 10mM |
| 628 | 9-A06          | BML-AC3177  | Mestranol                                                | 72-33-3     | 310.4 | 10mM |
| 629 | 9-A07          | BML-AC1569  | Metaproterenol Hemisulfate (Orciprenaline)               | 5874-97-5   | 260.3 | 10mM |
| 630 | 9-A08          | BML-AC3178  | Metaraminol Bitartrate                                   | 33402-03-8  | 317.3 | 10mM |
| 631 | 9-A09          | BML-AC3179  | Metaxalone                                               | 1665-48-1   | 221.3 | 10mM |
| 632 | 9-A10          | BML-AC3180  | Methacholine Chloride                                    | 62-51-1     | 195.7 | 10mM |
| 633 | 9-A11          | BML-AC3181  | Methazolamide                                            | 554-57-4    | 236.3 | 10mM |
| 634 | 9-B02          | BML-AC3182  | Methenamine Hippurate                                    | 5714-73-8   | 319.4 | 10mM |
| 635 | 9-B03          | BML-AC3183  | Methocarbamol                                            | 532-03-6    | 241.2 | 10mM |
| 636 | 9-B04          | ALX-440-045 | Methotrexate                                             | 133073-73-1 | 472.5 | 10mM |
| 637 | 9-B05          | BML-EI132   | Methoxsalen (Xanthotoxin)                                | 298-81-7    | 216.2 | 10mM |
| 638 | 9-B06          | BML-AC3184  | Methscopolamine Bromide ((-)-Scopolamine Methyl Bromide) | 155-41-9    | 398.3 | 10mM |
| 639 | 9-B07          | BML-AC3185  | Methsuximide                                             | 77-41-8     | 203.2 | 10mM |
| 640 | 9-B08          | BML-AC3186  | Methyclothiazide                                         | 135-07-9    | 360.2 | 10mM |
| 641 | 9-B09          | BML-AC3187  | Methyl Aminolevulinate·HCl                               | 79416-27-6  | 181.6 | 10mM |
| 642 | 9-B10          | BML-NP189   | Methylergonovine Maleate                                 | 57432-61-8  | 455.5 | 10mM |
| 643 | 9-B11          | BML-AC2611  | Metolazone                                               | 17560-51-9  | 365.8 | 10mM |
| 644 | 9-C02          | BML-EI256   | Metyrapone                                               | 54-36-4     | 226.3 | 10mM |

| #   | Plate Location | Cat No.     | Name                                                        | CAS #       | MW     | Conc |
|-----|----------------|-------------|-------------------------------------------------------------|-------------|--------|------|
| 645 | 9-C03          |             | Blank                                                       |             |        |      |
| 646 | 9-C04          | BML-AC2002  | Mexiletine·HCl                                              | 5370-01-4   | 215.7  | 10mM |
| 647 | 9-C05          | BML-AC2328  | Micafungin                                                  | 235114-32-6 | 1270.3 | 10mM |
| 648 | 9-C06          | BML-AC2343  | Miconazole                                                  | 22916-47-8  | 416.1  | 10mM |
| 649 | 9-C07          |             | Blank                                                       |             |        |      |
| 650 | 9-C08          | BML-AC3190  | Midodrine·HCl                                               | 3092-17-9   | 254.9  | 10mM |
| 651 | 9-C09          | BML-AC3191  | Miglitol                                                    | 72432-03-2  | 207.2  | 10mM |
| 652 | 9-C10          | BML-AC2021  | Milnacipran·HCl                                             | 101152-94-7 | 246.4  | 10mM |
| 653 | 9-C11          | BML-AC1366  | Mirtazapine                                                 | 61337-67-5  | 265.4  | 10mM |
| 654 | 9-D02          | BML-AC2341  | Mitotane                                                    | 53-19-0     | 320    | 10mM |
| 655 | 9-D03          | BML-AC1305  | Modafinil (Schedule Iv)                                     | 68693-11-8  | 273.4  | 10mM |
| 656 | 9-D04          | BML-AC3192  | Moexipril·HCl                                               | 82586-52-5  | 535    | 10mM |
| 657 | 9-D05          | BML-AC3193  | Mometasone Furoate                                          | 83919-23-7  | 521.4  | 10mM |
| 658 | 9-D06          | BML-AC3194  | Mupirocin                                                   | 12650-69-0  | 500.6  | 10mM |
| 659 | 9-D07          | BML-AC3195  | Nadolol                                                     | 42200-33-9  | 309.4  | 10mM |
| 660 | 9-D08          | BML-AC3196  | Nafcillin·Na                                                | 985-16-0    | 436.5  | 10mM |
| 661 | 9-D09          | BML-AC3197  | Naftifine·HCl                                               | 65473-14-5  | 323.9  | 10mM |
| 662 | 9-D10          | BML-AC3198  | Naratriptan·HCl                                             | 143388-64-1 | 371.9  | 10mM |
| 663 | 9-D11          | BML-AC2112  | Natamycin                                                   | 7681-93-8   | 665.7  | 10mM |
| 664 | 9-E02          | BML-AC3199  | Nebivolol·HCl                                               | 152520-56-4 | 441.9  | 10mM |
| 665 | 9-E03          | BML-AC3200  | Nelarabine                                                  | 121032-29-9 | 297.3  | 10mM |
| 666 | 9-E04          | BML-AC3201  | Nepafenac                                                   | 78281-72-8  | 254.3  | 10mM |
| 667 | 9-E05          | BML-AC2306  | Nevirapine                                                  | 129618-40-2 | 266.9  | 10mM |
| 668 | 9-E06          | ALX-460-009 | Niacin (Known As Vitamin B3, Nicotinic Acid And Vitamin Pp) | 59-67-6     | 123.1  | 10mM |
| 669 | 9-E07          | BML-AC782   | Nicotine                                                    | 54-11-5     | 162.3  | 10mM |
| 670 | 9-E08          | BML-AC2005  | Nilotinib                                                   | 641571-10-0 | 529.5  | 10mM |
| 671 | 9-E09          | BML-AC3202  | Nilutamide                                                  | 63612-50-0  | 317.2  | 10mM |
| 672 | 9-E10          | BML-AC3203  | Nitazoxanide                                                | 55981-09-4  | 307.3  | 10mM |
| 673 | 9-E11          | BML-AC3204  | Nitisinone                                                  | 104206-65-7 | 329.2  | 10mM |
| 674 | 9-F02          | BML-AC2317  | Nitrofurantoin                                              | 67-20-9     | 238.2  | 10mM |
| 675 | 9-F03          | BML-AC2345  | Nizatidine                                                  | 76963-41-2  | 331.5  | 10mM |
| 676 | 9-F04          | BML-AC3205  | Nortriptyline·HCl                                           | 894-71-3    | 299.8  | 10mM |
| 677 | 9-F05          | BML-AC3206  | Olsalazine·Na                                               | 6054-98-4   | 302.2  | 10mM |
| 678 | 9-F06          | ALX-350-152 | Orlistat (Tetrahydrolipstatin)                              | 96829-58-2  | 495.7  | 10mM |
| 679 | 9-F07          | BML-AC3207  | Oxaprozin                                                   | 21256-18-8  | 293.3  | 10mM |
| 680 | 9-F08          | BML-AC3208  | Oxazepam                                                    | 604-75-1    | 286.7  | 10mM |
| 681 | 9-F09          | BML-AC3209  | Oxtriphylline                                               | 4499-40-5   | 283.3  | 10mM |
| 682 | 9-F10          | BML-AC3210  | Oxybutynin Chloride                                         | 1508-65-2   | 394    | 10mM |
| 683 | 9-F11          | BML-AC3211  | Oxytetracycline·HCl                                         | 2058-46-0   | 496.9  | 10mM |
| 684 | 9-G02          | BML-AC2009  | Paliperidone                                                | 144598-75-4 | 426.5  | 10mM |
| 685 | 9-G03          | BML-AC3212  | Palonosetron·HCl                                            | 135729-62-3 | 332.9  | 10mM |
| 686 | 9-G04          | BML-AC3213  | Paromomycin Sulfate                                         | 1263-89-4   | 713.7  | 10mM |
| 687 | 9-G05          | BML-AC3214  | Pazopanib·HCl                                               | 635702-64-6 | 474    | 10mM |
| 688 | 9-G06          | BML-AC3215  | Pemetrexed Disodium                                         | 150399-23-8 | 471.4  | 10mM |
| 689 | 9-G07          | BML-AC3216  | Pemirolast Potassium                                        | 100299-08-9 | 266.3  | 10mM |
| 690 | 9-G08          | BML-AC3217  | Penicillamine (D-Penicillamine)                             | 52-67-5     | 149.2  | 10mM |
| 691 | 9-G09          | BML-AC2607  | Penicillin G Potassium (Benzylpenicillin)                   | 113-98-4    | 334.4  | 10mM |
| 692 | 9-G10          | BML-AC1801  | Pentamidine Isethionate                                     | 140-64-7    | 592.7  | 10mM |
| 693 | 9-G11          | BML-AC2019  | Pentostatin                                                 | 53910-25-1  | 268.3  | 10mM |
| 694 | 9-H02          | BML-AC3218  | Perindopril Erbumine                                        | 107133-36-8 | 441.6  | 10mM |
| 695 | 9-H03          | BML-PR103   | Permethrin                                                  | 52645-53-1  | 391.3  | 10mM |
| 696 | 9-H04          | BML-AC2349  | Perphenazine                                                | 58-39-9     | 404    | 10mM |
| 697 | 9-H05          | BML-AC3219  | Phenelzine Sulfate                                          | 156-51-4    | 234.3  | 10mM |
| 698 | 9-H06          | BML-AC3220  | Phenylephrine                                               | 59-42-7     | 167.2  | 10mM |
| 699 | 9-H07          | BML-AC3221  | Phytonadione                                                | 84-80-0     | 450.7  | 10mM |
| 700 | 9-H08          | BML-AC3222  | Pimecrolimus                                                | 137071-32-0 | 810.5  | 10mM |
| 701 | 9-H09          | BML-AC3223  | Pitavastatin Calcium                                        | 147526-32-7 | 881    | 10mM |
| 702 | 9-H10          |             | Blank                                                       |             |        |      |

| #   | Plate Location | Cat No.     | Name                        | CAS #       | MW     | Conc |
|-----|----------------|-------------|-----------------------------|-------------|--------|------|
| 703 | 9-H11          | BML-AC3225  | Podofilox                   | 518-28-5    | 414.4  | 10mM |
| 704 | 10-A02         | BML-AC3226  | Posaconazole                | 171228-49-2 | 700.8  | 10mM |
| 705 | 10-A03         | BML-AC3227  | Pralidoxime Chloride        | 51-15-0     | 172.6  | 10mM |
| 706 | 10-A04         | BML-AC3228  | Prasugrel                   | 150322-43-3 | 373.4  | 10mM |
| 707 | 10-A05         | BML-AC2309  | Pravastatin·Na              | 81131-70-6  | 446.5  | 10mM |
| 708 | 10-A06         | BML-AC3229  | Pregabalin                  | 148553-50-8 | 159.2  | 10mM |
| 709 | 10-A07         | BML-AC3230  | Prilocaine·HCl              | 1786-81-8   | 256.8  | 10mM |
| 710 | 10-A08         | BML-AC484   | Primidone                   | 125-33-7    | 218.3  | 10mM |
| 711 | 10-A09         | ALX-430-113 | Probenecid                  | 57-66-9     | 285.4  | 10mM |
| 712 | 10-A10         |             | Blank                       |             |        |      |
| 713 | 10-A11         | BML-AC3232  | Proparacaine·HCl            | 5875-06-9   | 330.9  | 10mM |
| 714 | 10-B02         | BML-AC2344  | Propylthiouracil            | 51-52-5     | 170.2  | 10mM |
| 715 | 10-B03         | BML-AC3233  | Protriptyline·HCl           | 1225-55-4   | 299.8  | 10mM |
| 716 | 10-B04         | BML-AC2314  | Pyrazinamide                | 98-96-4     | 123.1  | 10mM |
| 717 | 10-B05         | BML-AC3234  | Pyridostigmine Bromide      | 101-26-8    | 261.1  | 10mM |
| 718 | 10-B06         | BML-AC2358  | Pyrimethamine               | 58-14-0     | 248.7  | 10mM |
| 719 | 10-B07         | BML-AC129   | Quinidine·HCl·H2O           | 56-54-2     | 324.4  | 10mM |
| 720 | 10-B08         | BML-AC3235  | Rabeprazole·Na              | 117976-90-6 | 381.4  | 10mM |
| 721 | 10-B09         | BML-AC3236  | Raltegravir                 | 871038-72-1 | 444.4  | 10mM |
| 722 | 10-B10         | BML-AC3237  | Ramelteon                   | 196597-26-9 | 259.3  | 10mM |
| 723 | 10-B11         | BML-AC3238  | Rasagiline Mesylate         | 161735-79-1 | 267.3  | 10mM |
| 724 | 10-C02         | BML-AC3239  | Regadenoson                 | 313348-27-5 | 390.4  | 10mM |
| 725 | 10-C03         | BML-AC3240  | Repaglinide                 | 135062-02-1 | 452.6  | 10mM |
| 726 | 10-C04         | BML-NP254   | Reserpine                   | 50-55-5     | 608.7  | 10mM |
| 727 | 10-C05         | BML-AC3241  | Rifabutin                   | 72559-06-9  | 847    | 10mM |
| 728 | 10-C06         | BML-AC3242  | Rifapentine                 | 61379-65-5  | 877    | 10mM |
| 729 | 10-C07         | BML-AC3243  | Rifaximin                   | 80621-81-4  | 785.9  | 10mM |
| 730 | 10-C08         | BML-AC2014  | Ritonavir                   | 155213-67-5 | 721    | 10mM |
| 731 | 10-C09         | BML-AC2026  | Rizatriptan Benzoate        | 145202-66-0 | 391.5  | 10mM |
| 732 | 10-C10         | BML-D113    | Ropinirole·HCl              | 91374-20-8  | 296.8  | 10mM |
| 733 | 10-C11         | BML-AC3245  | Ropivacaine·HCl Monohydrate | 132112-35-7 | 274.4  | 10mM |
| 734 | 10-D02         | BML-AC2346  | Rosuvastatin Calcium        | 147098-20-2 | 1001.1 | 10mM |
| 735 | 10-D03         | BML-AC3246  | Rufinamide                  | 106308-44-5 | 238.2  | 10mM |
| 736 | 10-D04         | BML-AC3247  | Saquinavir Mesylate         | 149845-06-7 | 767    | 10mM |
| 737 | 10-D05         | BML-AC3248  | Selegiline·HCl              | 14611-52-0  | 223.7  | 10mM |
| 738 | 10-D06         | BML-NS115   | Sertraline·HCl              | 79559-97-0  | 342.7  | 10mM |
| 739 | 10-D07         | BML-AC3249  | Silver Sulfadiazine         | 22199-08-2  | 357.1  | 10mM |
| 740 | 10-D08         | BML-AC3251  | Sitagliptin Phosphate       | 654671-77-9 | 505.3  | 10mM |
| 741 | 10-D09         | BML-AC1514  | Sorafenib Tosylate          | 475207-59-1 | 637    | 10mM |
| 742 | 10-D10         | BML-AC2302  | Stavudine                   | 3056-17-5   | 224.2  | 10mM |
| 743 | 10-D11         | ALX-380-010 | Streptozocin                | 18883-66-4  | 265.2  | 10mM |
| 744 | 10-E02         | BML-AC3252  | Sulconazole Nitrate         | 61318-91-0  | 460.8  | 10mM |
| 745 | 10-E03         | BML-AC3253  | Sulfacetamide·Na            | 127-56-0    | 236.2  | 10mM |
| 746 | 10-E04         | BML-AC2319  | Sulfamethoxazole            | 723-46-6    | 253.3  | 10mM |
| 747 | 10-E05         | BML-AC3254  | Sulfanilamide               | 63-74-1     | 172.2  | 10mM |
| 748 | 10-E06         | BML-AC2013  | Sunitinib Malate            | 341031-54-7 | 532.6  | 10mM |
| 749 | 10-E07         | ALX-380-008 | Tacrolimus (Fk506)          | 104987-11-3 | 804    | 10mM |
| 750 | 10-E08         | BML-AC3255  | Tadalafil                   | 171596-29-5 | 389.4  | 10mM |
| 751 | 10-E09         | BML-AC3256  | Tazarotene                  | 118292-40-3 | 351.5  | 10mM |
| 752 | 10-E10         | BML-AC3257  | Telbivudine                 | 3424-98-4   | 242.2  | 10mM |
| 753 | 10-E11         | BML-AC3258  | Telithromycin               | 191114-48-4 | 812    | 10mM |
| 754 | 10-F02         | BML-AC3259  | Temazepam                   | 846-50-4    | 300.7  | 10mM |
| 755 | 10-F03         | BML-AC3260  | Temsirolimus                | 162635-04-3 | 1030.3 | 10mM |
| 756 | 10-F04         | ALX-400-053 | Teniposide                  | 29767-20-2  | 656.7  | 10mM |
| 757 | 10-F05         | BML-AC2303  | Tenofovir                   | 147127-20-6 | 287.2  | 10mM |
| 758 | 10-F06         | BML-AC3261  | Terbutaline Hemisulfate     | 23031-32-5  | 274.3  | 10mM |
| 759 | 10-F07         | BML-AC3262  | Terconazole                 | 67915-31-5  | 532.5  | 10mM |
| 760 | 10-F08         | BML-AC3263  | Testosterone Enanthate      | 315-37-7    | 400.6  | 10mM |
| 761 | 10-F09         | BML-AC3264  | Tetrabenazine               | 58-46-8     | 371.4  | 10mM |

| #   | Plate Location | Cat No.     | Name                        | CAS #       | MW     | Conc |
|-----|----------------|-------------|-----------------------------|-------------|--------|------|
| 762 | 10-F10         | BML-AC3265  | Tetrahydrozoline·HCl        | 522-48-5    | 236.7  | 10mM |
| 763 | 10-F11         | ALX-480-062 | Theophylline                | 58-55-9     | 180.2  | 10mM |
| 764 | 10-G02         | BML-AC1532  | Thioguanine (6-Thioguanine) | 154-42-7    | 167.2  | 10mM |
| 765 | 10-G03         | BML-AC2601  | Thiotepa                    | 52-24-4     | 189.2  | 10mM |
| 766 | 10-G04         |             | Blank                       |             |        |      |
| 767 | 10-G05         | BML-AC3267  | Tiagabine·HCl               | 145821-59-6 | 375.6  | 10mM |
| 768 | 10-G06         | BML-AC3268  | Tigecycline                 | 220620-09-7 | 585.7  | 10mM |
| 769 | 10-G07         | BML-AC3269  | Tiludronate Disodium        | 149845-07-8 | 362.6  | 10mM |
| 770 | 10-G08         | BML-AC3270  | Tiopronin                   | 1953-02-2   | 163.2  | 10mM |
| 771 | 10-G09         | BML-AC3271  | Tirofiban·HCl               | 150915-40-5 | 477.1  | 10mM |
| 772 | 10-G10         | BML-AC3272  | Tolterodine Tartrate        | 124937-52-6 | 475.6  | 10mM |
| 773 | 10-G11         | BML-AC3273  | Tolvaptan                   | 150683-30-0 | 448.9  | 10mM |
| 774 | 10-H02         | BML-AC3274  | Topiramate                  | 97240-79-4  | 339.4  | 10mM |
| 775 | 10-H03         | BML-AC3275  | Torsemide                   | 56211-40-6  | 348.4  | 10mM |
| 776 | 10-H04         | ALX-270-493 | Trandolapril                | 87679-37-6  | 430.5  | 10mM |
| 777 | 10-H05         | BML-AC3276  | Travoprost                  | 157283-68-6 | 500.6  | 10mM |
| 778 | 10-H06         | BML-AC2318  | Trazodone·HCl               | 25332-39-2  | 408.3  | 10mM |
| 779 | 10-H07         | BML-AC2357  | Tretinoin                   | 302-79-4    | 300.4  | 10mM |
| 780 | 10-H08         | BML-AC3277  | Triamcinolone Acetonide     | 76-25-5     | 434.5  | 10mM |
| 781 | 10-H09         | ALX-440-043 | Triamterene                 | 396-01-0    | 253.3  | 10mM |
| 782 | 10-H10         | BML-AC3278  | Triazolam                   | 28911-01-5  | 343.2  | 10mM |
| 783 | 10-H11         | BML-AC3279  | Trisentine Dihydrochloride  | 38260-01-4  | 219.2  | 10mM |
| 784 | 11-A02         | BML-AC3280  | Trihexyphenidyl·HCl         | 52-49-3     | 337.9  | 10mM |
| 785 | 11-A03         | BML-AC3281  | Trimethadione               | 127-48-0    | 143.1  | 10mM |
| 786 | 11-A04         | BML-AC3282  | Trimethobenzamide·HCl       | 554-92-7    | 424.9  | 10mM |
| 787 | 11-A05         | BML-AC3283  | Trimipramine Maleate        | 521-78-8    | 410.5  | 10mM |
| 788 | 11-A06         | BML-AC3284  | Tropium Chloride            | 10405-02-4  | 428    | 10mM |
| 789 | 11-A07         | BML-AC3285  | Ursodiol                    | 128-13-2    | 392.6  | 10mM |
| 790 | 11-A08         | BML-AC3286  | Valganciclovir·HCl          | 175865-59-5 | 390.8  | 10mM |
| 791 | 11-A09         | ALX-550-304 | Valproate·Na                | 1069-66-5   | 166.2  | 10mM |
| 792 | 11-A10         | BML-AC3287  | Valsartan                   | 137862-53-4 | 435.5  | 10mM |
| 793 | 11-A11         | ALX-380-279 | Vancomycin·HCl              | 1404-93-9   | 1485.7 | 10mM |
| 794 | 11-B02         | BML-AC3288  | Varenicline Tartrate        | 375815-87-5 | 361.4  | 10mM |
| 795 | 11-B03         | BML-AC506   | Vigabatrin                  | 60643-86-9  | 129.2  | 10mM |
| 796 | 11-B04         | BML-AC3289  | Voriconazole                | 137234-62-9 | 349.3  | 10mM |
| 797 | 11-B05         | BML-AC2354  | Warfarin·Na                 | 129-06-6    | 330.3  | 10mM |
| 798 | 11-B06         | BML-AC3290  | Zaleplon                    | 151319-34-5 | 305.3  | 10mM |
| 799 | 11-B07         | BML-AC3291  | Zanamivir                   | 139110-80-8 | 332.3  | 10mM |
| 800 | 11-B08         | BML-AC1570  | Ziprasidone                 | 122883-93-6 | 412.9  | 10mM |
